# Supplementary material for: ITIH5, as a predictor of prognosis and immunotherapy response for P53-like bladder cancer, is related to cell proliferation and invasion
Source: Royal Society of Chemistry journal article supplement (doi:10.1039/d2mo00322h), 2023-07-11

11 origin 24–330

SV40 polyA 469–750

$\beta$ -galactosidase  $\alpha$ -fragment 812–1183

multiple cloning site 1015–1122

*lac* promoter 1184–1305

CMV promoter 1306–1895

pUC origin 1954–2621

HSV-TK polyA 2760–3031

neomycin/kanamycin resistance ORF 3209–4000

SV40 promoter 4035–4373

*bla* promoter 4392–4518

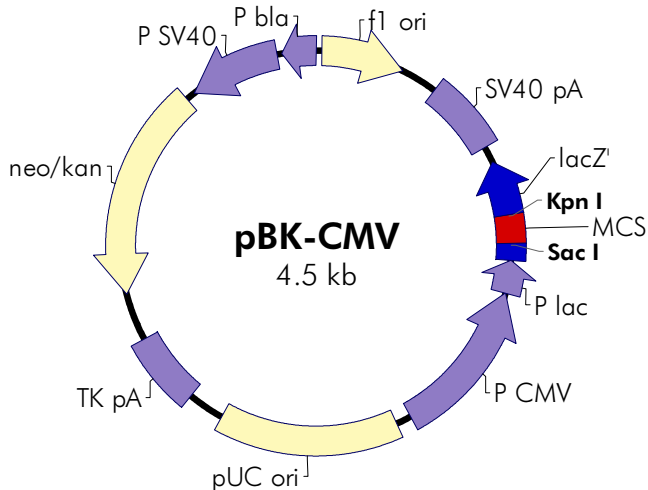

### pBK-CMV Multiple Cloning Site Region

(sequence shown 952–1196)

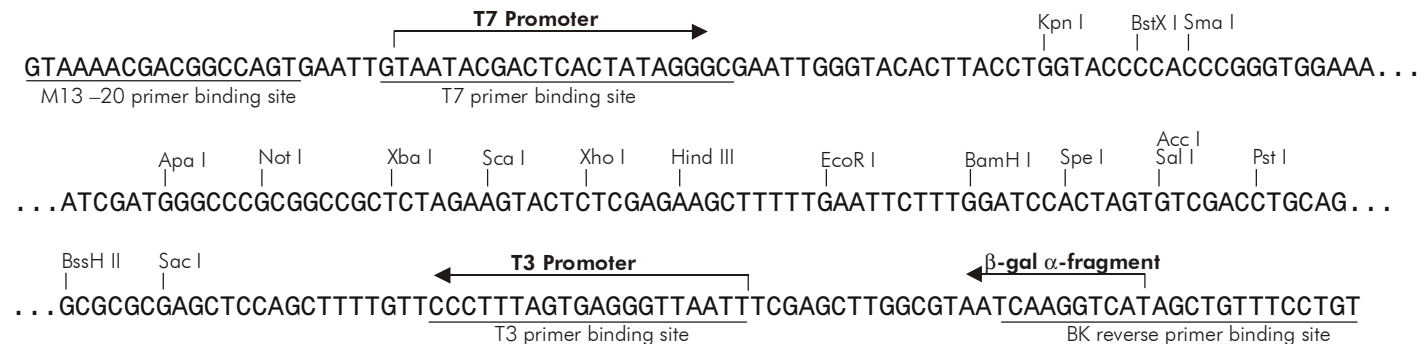

Supplement: d2mo00322h3.pdf [file d2mo00322h3.pdf]
