# Supplementary material for: ITIH5, as a predictor of prognosis and immunotherapy response for P53-like bladder cancer, is related to cell proliferation and invasion
Source: Royal Society of Chemistry journal article supplement (doi:10.1039/d2mo00322h), 2023-07-11
Supplement: d2mo00322h8.pdf [file d2mo00322h8.pdf]

## Supplementary Materials

**Figure S1.** Characterization of p53 pathway activity in each cell in the GDSC database

**Figure S2.** Characterization of p53 pathway activity in each cell in the CCLE database

**Figure S3.** The diagram of the ITIH5-pBK-CMV expression vector

**Figure S4.** The predictive value of ITIH5 for the prognosis of bladder cancer under different indicators. (A) OS; (B) PFS; (C) DFS; (D) DSS.

**Figure S5.** The results of GO Analysis (TOP 15). The highlighted terms are immunological functions. (A) biological process (BP); (B) cellular component (CC); (C) molecular function (MF).

**Figure S6.** The original Western blots.

**Figure S7.** Prognostic significance of ITIH5 in different TP53 mutation subtypes

**Table S1.** The Molecular Classification of Bladder Cancer using TCGA-BLCA data.

**Table S2.** The Molecular Classification of Bladder Cancer using IMvigor210 data.

**Table S3.** The results of Gene Set Enrichment Analysis.
