# Supplementary material for: ITIH5, as a predictor of prognosis and immunotherapy response for P53-like bladder cancer, is related to cell proliferation and invasion
Source: Royal Society of Chemistry journal article supplement (doi:10.1039/d2mo00322h), 2023-07-11
Supplement: d2mo00322h9.xlsx [file d2mo00322h9.xlsx]

## Sheet: Table S1
Table 1. The Molecular Classification of Bladder Cancer using TCGA-BLCA data.
ID	Baylor.subtype	UNC.subtype	CIT.subtype	Lund.subtype	MDA.subtype	TCGA.subtype
TCGA-FD-A3SS-01A	Differentiated	Basal	MC7	GU-Inf	luminal	Luminal_infiltrated
TCGA-FD-A43S-01A	Differentiated	Basal	MC4	Uro-Inf	p53-like	Luminal_infiltrated
TCGA-UY-A78K-01A	Differentiated	Luminal	MC3	GU	luminal	Luminal_infiltrated
TCGA-DK-A2HX-01A	Differentiated	Basal	MC4	GU-Inf	p53-like	Luminal_infiltrated
TCGA-DK-A1A3-01A	Differentiated	Luminal	MC2	GU-Inf	luminal	Luminal_infiltrated
TCGA-GC-A6I3-01A	Differentiated	Luminal	MC1	UroC	luminal	Luminal_infiltrated
TCGA-XF-AAMJ-01A	Differentiated	Basal	MC4	Uro-Inf	p53-like	Luminal_infiltrated
TCGA-GC-A6I1-01A	Basal	Basal	MC7	Ba/Sq	basal	Basal_squamous
TCGA-ZF-A9RL-01A	Differentiated	Luminal	MC1	UroA-Prog	luminal	Luminal_papillary
TCGA-DK-A3IL-01A	Differentiated	Luminal	MC1	UroC	luminal	Luminal
TCGA-E7-A6MF-01A	Differentiated	Luminal	MC1	UroA-Prog	p53-like	Luminal_papillary
TCGA-BT-A20R-01A	Differentiated	Basal	MC4	GU-Inf	luminal	Luminal_infiltrated
TCGA-H4-A2HQ-01A	Differentiated	Luminal	MC1	UroA-Prog	luminal	Luminal_papillary
TCGA-GV-A3QH-01A	Differentiated	Luminal	MC1	GU	luminal	Luminal_papillary
TCGA-4Z-AA82-01A	Basal	Basal	MC7	Ba/Sq-Inf	basal	Basal_squamous
TCGA-E7-A4XJ-01A	Differentiated	Luminal	MC1	UroA-Prog	luminal	Luminal_papillary
TCGA-XF-A8HE-01A	Basal	Basal	MC7	Ba/Sq	basal	Basal_squamous
TCGA-XF-A9T0-01A	Differentiated	Luminal	MC3	UroC	luminal	Luminal
TCGA-FD-A5BT-01A	Differentiated	Basal	MC7	Mes-like	basal	Basal_squamous
TCGA-FD-A3SN-01A	Basal	Basal	MC7	Ba/Sq-Inf	luminal	Basal_squamous
TCGA-G2-AA3C-01A	Differentiated	Basal	MC7	Mes-like	basal	Basal_squamous
TCGA-HQ-A2OE-01A	Differentiated	Luminal	MC1	UroA-Prog	luminal	Luminal_papillary
TCGA-BL-A3JM-01A	Differentiated	Basal	MC7	Sc/NE-like	basal	Neuronal
TCGA-XF-AAN3-01A	Basal	Basal	MC7	Ba/Sq-Inf	p53-like	Basal_squamous
TCGA-FD-A3SR-01A	Differentiated	Basal	MC4	GU-Inf	luminal	Luminal_infiltrated
TCGA-4Z-AA89-01A	Differentiated	Luminal	MC1	UroA-Prog	luminal	Luminal_papillary
TCGA-G2-A2EO-01A	Differentiated	Luminal	MC1	Uro-Inf	luminal	Luminal_infiltrated
TCGA-ZF-AA5H-01A	Basal	Basal	MC7	Ba/Sq-Inf	basal	Basal_squamous
TCGA-BT-A20V-01A	Differentiated	Basal	MC7	Sc/NE-like	luminal	Basal_squamous
TCGA-GC-A3WC-01A	Basal	Basal	MC7	Ba/Sq	basal	Basal_squamous
TCGA-GV-A3JV-01A	Differentiated	Luminal	MC1	UroC	p53-like	Luminal
TCGA-YF-AA3M-01A	Basal	Basal	MC7	UroB	luminal	Luminal_papillary
TCGA-FD-A3B5-01A	Basal	Basal	MC7	Ba/Sq	basal	Basal_squamous
TCGA-CF-A47V-01A	Differentiated	Luminal	MC1	UroA-Prog	p53-like	Luminal_papillary
TCGA-GU-A42P-01A	Differentiated	Luminal	MC1	GU	luminal	Luminal_papillary
TCGA-BT-A20T-01A	Differentiated	Basal	MC1	Uro-Inf	p53-like	Luminal_infiltrated
TCGA-XF-AAN0-01A	Differentiated	Basal	MC7	GU-Inf	luminal	Luminal_infiltrated
TCGA-E7-A7DV-01A	Basal	Basal	MC7	Mes-like	p53-like	Basal_squamous
TCGA-GV-A40E-01A	Basal	Basal	MC7	Ba/Sq-Inf	basal	Basal_squamous
TCGA-FJ-A3Z9-01A	Differentiated	Luminal	MC1	UroA-Prog	luminal	Luminal_papillary
TCGA-XF-A9ST-01A	Differentiated	Basal	MC7	GU-Inf	p53-like	Neuronal
TCGA-FJ-A3ZF-01A	Differentiated	Luminal	MC3	GU	luminal	Luminal_papillary
TCGA-YC-A89H-01A	Differentiated	Luminal	MC7	Ba/Sq	luminal	Luminal_papillary
TCGA-CF-A9FM-01A	Differentiated	Luminal	MC1	UroA-Prog	p53-like	Luminal_papillary
TCGA-DK-A1AD-01A	Differentiated	Luminal	MC1	UroC	luminal	Luminal
TCGA-G2-A2EK-01A	Differentiated	Luminal	MC1	UroA-Prog	p53-like	Luminal_papillary
TCGA-E5-A2PC-01A	Basal	Basal	MC7	UroB	luminal	Basal_squamous
TCGA-C4-A0F1-01A	Basal	Basal	MC7	Ba/Sq	basal	Basal_squamous
TCGA-FD-A43N-01A	Differentiated	Luminal	MC1	UroC	luminal	Luminal
TCGA-BL-A13J-01A	Basal	Basal	MC7	Ba/Sq	luminal	Luminal_infiltrated
TCGA-FD-A3SO-01A	Basal	Basal	MC7	Ba/Sq-Inf	basal	Basal_squamous
TCGA-XF-A8HD-01A	Basal	Basal	MC7	GU-Inf	p53-like	Basal_squamous
TCGA-BT-A20X-01A	Basal	Basal	MC7	Ba/Sq	basal	Basal_squamous
TCGA-ZF-AA52-01A	Differentiated	Basal	MC4	GU-Inf	p53-like	Luminal_infiltrated
TCGA-DK-AA76-01A	Differentiated	Luminal	MC1	UroA-Prog	luminal	Luminal_papillary
TCGA-GV-A3JW-01A	Differentiated	Luminal	MC1	UroA-Prog	luminal	Luminal_papillary
TCGA-FD-A3N6-01A	Basal	Basal	MC7	Ba/Sq	basal	Basal_squamous
TCGA-CU-A5W6-01A	Differentiated	Luminal	MC1	UroA-Prog	luminal	Luminal_papillary
TCGA-DK-A2I4-01A	Basal	Basal	MC7	Mes-like	basal	Basal_squamous
TCGA-DK-AA6M-01A	Basal	Basal	MC7	Ba/Sq-Inf	basal	Basal_squamous
TCGA-4Z-AA7Y-01A	Differentiated	Luminal	MC1	UroA-Prog	luminal	Luminal_papillary
TCGA-DK-A3WY-01A	Differentiated	Basal	MC4	Mes-like	basal	Basal_squamous
TCGA-E7-A3X6-01A	Basal	Basal	MC7	UroB	luminal	Basal_squamous
TCGA-K4-A3WV-01A	Differentiated	Basal	MC7	Sc/NE-like	basal	Neuronal
TCGA-DK-A3IQ-01A	Differentiated	Basal	MC4	Mes-like	p53-like	Luminal_infiltrated
TCGA-ZF-AA56-01A	Basal	Basal	MC7	Ba/Sq	basal	Basal_squamous
TCGA-CU-A3QU-01A	Differentiated	Luminal	MC1	GU	luminal	Luminal_papillary
TCGA-FD-A6TI-01A	Differentiated	Luminal	MC1	UroC	p53-like	Luminal
TCGA-XF-A9T3-01A	Basal	Basal	MC7	Mes-like	p53-like	Basal_squamous
TCGA-FD-A3B3-01A	Basal	Basal	MC7	Ba/Sq-Inf	basal	Basal_squamous
TCGA-YF-AA3L-01A	Differentiated	Luminal	MC1	UroA-Prog	p53-like	Luminal_papillary
TCGA-SY-A9G0-01A	Differentiated	Basal	MC4	Uro-Inf	p53-like	Luminal_infiltrated
TCGA-ZF-A9R2-01A	Differentiated	Luminal	MC1	UroA-Prog	luminal	Luminal_papillary
TCGA-GU-AATQ-01A	Basal	Basal	MC7	UroB	basal	Basal_squamous
TCGA-FD-A5C1-01A	Basal	Basal	MC7	Ba/Sq-Inf	basal	Basal_squamous
TCGA-DK-A2I1-01A	Differentiated	Luminal	MC1	UroC	p53-like	Luminal_infiltrated
TCGA-CF-A5U8-01A	Differentiated	Luminal	MC1	UroA-Prog	p53-like	Luminal_papillary
TCGA-UY-A9PB-01A	Basal	Basal	MC7	Ba/Sq-Inf	basal	Basal_squamous
TCGA-DK-A3X1-01A	Differentiated	Luminal	MC1	UroC	luminal	Luminal_papillary
TCGA-DK-A1AC-01A	Differentiated	Luminal	MC3	GU	luminal	Luminal_infiltrated
TCGA-FD-A62N-01A	Basal	Basal	MC7	Ba/Sq-Inf	basal	Basal_squamous
TCGA-DK-AA75-01A	Differentiated	Luminal	MC1	GU	luminal	Luminal_papillary
TCGA-XF-A9SL-01A	Differentiated	Basal	MC4	GU-Inf	p53-like	Luminal_infiltrated
TCGA-XF-A9T4-01A	Basal	Basal	MC7	Ba/Sq	basal	Basal_squamous
TCGA-XF-AAN2-01A	Differentiated	Basal	MC7	Ba/Sq	basal	Basal_squamous
TCGA-BT-A2LD-01A	Differentiated	Basal	MC7	GU-Inf	p53-like	Basal_squamous
TCGA-ZF-A9R1-01A	Differentiated	Luminal	MC1	UroA-Prog	p53-like	Luminal
TCGA-ZF-A9R9-01A	Differentiated	Basal	MC4	UroC	p53-like	Luminal_infiltrated
TCGA-DK-A6AV-01A	Differentiated	Luminal	MC1	UroA-Prog	luminal	Luminal_papillary
TCGA-XF-AAMY-01A	Differentiated	Luminal	MC1	UroC	luminal	Luminal
TCGA-GU-A763-01A	Differentiated	Luminal	MC1	UroA-Prog	p53-like	Luminal_papillary
TCGA-FD-A3B7-01A	Basal	Basal	MC7	Ba/Sq-Inf	basal	Basal_squamous
TCGA-FD-A3NA-01A	Differentiated	Luminal	MC1	Uro-Inf	luminal	Luminal_papillary
TCGA-CF-A47T-01A	Differentiated	Luminal	MC1	UroA-Prog	luminal	Luminal_papillary
TCGA-BT-A0S7-01A	Differentiated	Basal	MC7	Ba/Sq	basal	Neuronal
TCGA-GC-A3BM-01A	Differentiated	Luminal	MC1	UroA-Prog	luminal	Luminal_papillary
TCGA-GD-A3OP-01A	Differentiated	Luminal	MC1	UroC	p53-like	Luminal_infiltrated
TCGA-SY-A9G5-01A	Basal	Basal	MC7	Ba/Sq-Inf	basal	Basal_squamous
TCGA-KQ-A41S-01A	Differentiated	Luminal	MC1	GU-Inf	luminal	Luminal_infiltrated
TCGA-4Z-AA7M-01A	Differentiated	Luminal	MC1	UroC	luminal	Luminal_papillary
TCGA-FD-A3SJ-01A	Differentiated	Luminal	MC3	UroC	p53-like	Luminal
TCGA-E7-A677-01A	Basal	Luminal	MC1	UroA-Prog	p53-like	Luminal_papillary
TCGA-UY-A8OD-01A	Differentiated	Basal	MC4	GU-Inf	p53-like	Luminal_infiltrated
TCGA-DK-AA6L-01A	Differentiated	Basal	MC7	UroB	basal	Basal_squamous
TCGA-GD-A2C5-01A	Differentiated	Luminal	MC1	UroC	p53-like	Luminal
TCGA-K4-A4AC-01A	Basal	Basal	MC7	Ba/Sq	basal	Basal_squamous
TCGA-FD-A62O-01A	Differentiated	Luminal	MC1	UroA-Prog	luminal	Luminal
TCGA-BT-A2LB-01A	Differentiated	Luminal	MC1	Uro-Inf	p53-like	Luminal_infiltrated
TCGA-FD-A3N5-01A	Basal	Basal	MC7	Ba/Sq	basal	Basal_squamous
TCGA-G2-A3VY-01A	Differentiated	Luminal	MC1	GU	luminal	Luminal_papillary
TCGA-DK-A1AA-01A	Differentiated	Luminal	MC1	UroA-Prog	p53-like	Luminal_papillary
TCGA-XF-A9SY-01A	Basal	Basal	MC7	Ba/Sq-Inf	basal	Basal_squamous
TCGA-DK-AA6Q-01A	Differentiated	Basal	MC7	Ba/Sq	basal	Basal_squamous
TCGA-G2-A2EL-01A	Differentiated	Basal	MC6	Sc/NE-like	luminal	Neuronal
TCGA-E7-A6ME-01A	Differentiated	Luminal	MC3	GU	luminal	Luminal_papillary
TCGA-HQ-A2OF-01A	Differentiated	Luminal	MC3	GU	luminal	Luminal_papillary
TCGA-FD-A6TF-01A	Differentiated	Basal	MC4	GU-Inf	p53-like	Luminal_infiltrated
TCGA-FD-A3SP-01A	Basal	Basal	MC7	Mes-like	basal	Basal_squamous
TCGA-BT-A20P-01A	Differentiated	Luminal	MC1	UroA-Prog	luminal	Luminal_papillary
TCGA-GV-A40G-01A	Differentiated	Luminal	MC1	GU	luminal	Luminal_papillary
TCGA-CF-A47S-01A	Differentiated	Luminal	MC1	UroA-Prog	p53-like	Luminal_papillary
TCGA-XF-A9T2-01A	Differentiated	Basal	MC7	Sc/NE-like	basal	Neuronal
TCGA-CF-A9FH-01A	Differentiated	Luminal	MC1	UroA-Prog	luminal	Luminal_papillary
TCGA-ZF-AA4X-01A	Differentiated	Luminal	MC1	GU	luminal	Luminal_papillary
TCGA-XF-AAMQ-01A	Differentiated	Luminal	MC1	UroA-Prog	luminal	Luminal_papillary
TCGA-CF-A3MH-01A	Differentiated	Luminal	MC1	UroA-Prog	luminal	Luminal_papillary
TCGA-DK-AA6W-01A	Differentiated	Basal	MC7	Sc/NE-like	luminal	Neuronal
TCGA-KQ-A41O-01A	Differentiated	Luminal	MC1	UroA-Prog	luminal	Luminal_papillary
TCGA-FJ-A3Z7-01A	Differentiated	Luminal	MC3	GU	p53-like	Luminal
TCGA-S5-AA26-01A	Differentiated	Luminal	MC1	UroA-Prog	luminal	Luminal_papillary
TCGA-FD-A3B4-01A	Basal	Basal	MC7	Ba/Sq-Inf	basal	Basal_squamous
TCGA-GC-A3OO-01A	Differentiated	Luminal	MC4	GU-Inf	p53-like	Luminal_infiltrated
TCGA-XF-A9SP-01A	Differentiated	Basal	MC4	Uro-Inf	p53-like	Luminal_infiltrated
TCGA-FD-A3SL-01A	Differentiated	Luminal	MC4	GU-Inf	p53-like	Luminal_infiltrated
TCGA-FD-A6TB-01A	Differentiated	Basal	MC4	Mes-like	p53-like	Luminal_infiltrated
TCGA-FD-A6TA-01A	Differentiated	Luminal	MC1	Uro-Inf	p53-like	Luminal_infiltrated
TCGA-XF-A8HB-01A	Differentiated	Luminal	MC1	UroB	luminal	Luminal_papillary
TCGA-UY-A8OB-01A	Basal	Basal	MC7	Ba/Sq	basal	Basal_squamous
TCGA-GU-A767-01A	Differentiated	Luminal	MC1	Uro-Inf	p53-like	Luminal
TCGA-FD-A43U-01A	Differentiated	Luminal	MC1	Uro-Inf	p53-like	Luminal_infiltrated
TCGA-DK-AA6T-01A	Differentiated	Basal	MC3	Mes-like	p53-like	Luminal_infiltrated
TCGA-5N-A9KI-01A	Differentiated	Luminal	MC4	GU-Inf	luminal	Luminal_infiltrated
TCGA-XF-A8HF-01A	Differentiated	Luminal	MC1	UroC	luminal	Luminal
TCGA-UY-A78L-01A	Basal	Basal	MC7	Ba/Sq	basal	Basal_squamous
TCGA-FD-A5C0-01A	Differentiated	Luminal	MC4	Uro-Inf	luminal	Luminal_infiltrated
TCGA-UY-A9PE-01A	Differentiated	Luminal	MC1	UroC	luminal	Luminal
TCGA-K4-A6FZ-01A	Differentiated	Basal	MC7	Ba/Sq	basal	Basal_squamous
TCGA-DK-A3IK-01A	Differentiated	Luminal	MC1	UroC	p53-like	Luminal
TCGA-LC-A66R-01A	Basal	Basal	MC7	Ba/Sq-Inf	basal	Basal_squamous
TCGA-GU-A762-01A	Basal	Basal	MC7	Ba/Sq-Inf	basal	Basal_squamous
TCGA-4Z-AA7O-01A	Differentiated	Luminal	MC1	UroA-Prog	luminal	Luminal_papillary
TCGA-DK-A6B5-01A	Basal	Basal	MC7	Ba/Sq	basal	Basal_squamous
TCGA-C4-A0F0-01A	Basal	Basal	MC7	Ba/Sq-Inf	basal	Basal_squamous
TCGA-UY-A78N-01A	Differentiated	Luminal	MC1	UroC	p53-like	Luminal
TCGA-G2-AA3F-01A	Differentiated	Luminal	MC1	UroC	luminal	Luminal_papillary
TCGA-ZF-AA53-01A	Basal	Basal	MC7	Ba/Sq-Inf	basal	Basal_squamous
TCGA-LT-A8JT-01A	Differentiated	Luminal	MC1	UroA-Prog	luminal	Luminal_papillary
TCGA-XF-A8HI-01A	Differentiated	Luminal	MC1	UroA-Prog	luminal	Luminal_papillary
TCGA-FJ-A3ZE-01A	Differentiated	Luminal	MC1	UroA-Prog	luminal	Luminal_papillary
TCGA-FD-A3SM-01A	Differentiated	Basal	MC7	Ba/Sq-Inf	luminal	Luminal_infiltrated
TCGA-DK-AA6X-01A	Differentiated	Basal	MC1	UroC	luminal	Luminal_infiltrated
TCGA-XF-A9SJ-01A	Differentiated	Basal	MC7	GU-Inf	p53-like	Luminal_infiltrated
TCGA-CF-A7I0-01A	Differentiated	Luminal	MC1	UroA-Prog	p53-like	Luminal
TCGA-GD-A3OQ-01A	Basal	Basal	MC7	UroB	basal	Luminal_papillary
TCGA-CU-A0YO-01A	Differentiated	Luminal	MC1	Uro-Inf	p53-like	Luminal_infiltrated
TCGA-DK-AA71-01A	Differentiated	Luminal	MC1	UroA-Prog	luminal	Luminal_papillary
TCGA-CF-A9FL-01A	Differentiated	Luminal	MC1	UroA-Prog	p53-like	Luminal_infiltrated
TCGA-ZF-AA5N-01A	Differentiated	Basal	MC7	UroA-Prog	luminal	Luminal_papillary
TCGA-UY-A9PF-01A	Differentiated	Luminal	MC1	UroC	p53-like	Luminal
TCGA-UY-A78P-01A	Basal	Basal	MC7	Ba/Sq	basal	Basal_squamous
TCGA-CF-A1HR-01A	Differentiated	Luminal	MC1	UroA-Prog	luminal	Luminal_papillary
TCGA-DK-A3IN-01A	Differentiated	Basal	MC7	Ba/Sq-Inf	basal	Basal_squamous
TCGA-UY-A9PH-01A	Differentiated	Luminal	MC1	Uro-Inf	luminal	Luminal_infiltrated
TCGA-GD-A76B-01A	Differentiated	Luminal	MC1	UroC	luminal	Luminal_papillary
TCGA-ZF-AA58-01A	Basal	Basal	MC7	Mes-like	basal	Basal_squamous
TCGA-ZF-AA4V-01A	Basal	Basal	MC7	GU-Inf	basal	Basal_squamous
TCGA-DK-AA6R-01A	Basal	Basal	MC7	Ba/Sq	basal	Basal_squamous
TCGA-FT-A61P-01A	Basal	Basal	MC7	Mes-like	p53-like	Basal_squamous
TCGA-2F-A9KQ-01A	Differentiated	Luminal	MC1	UroA-Prog	luminal	Luminal_papillary
TCGA-K4-A54R-01A	Differentiated	Basal	MC1	Uro-Inf	luminal	Luminal_infiltrated
TCGA-FD-A62S-01A	Basal	Basal	MC7	Ba/Sq-Inf	basal	Basal_squamous
TCGA-ZF-A9R3-01A	Differentiated	Luminal	MC1	UroA-Prog	luminal	Luminal_papillary
TCGA-BT-A42F-01A	Basal	Basal	MC7	Ba/Sq	basal	Basal_squamous
TCGA-K4-A83P-01A	Differentiated	Basal	MC4	Mes-like	p53-like	Luminal_infiltrated
TCGA-K4-A5RJ-01A	Basal	Basal	MC7	Mes-like	basal	Basal_squamous
TCGA-XF-A9SX-01A	Differentiated	Basal	MC7	Mes-like	basal	Basal_squamous
TCGA-KQ-A41N-01A	Differentiated	Luminal	MC1	UroA-Prog	p53-like	Luminal_papillary
TCGA-DK-A1AE-01A	Basal	Basal	MC7	UroB	basal	Basal_squamous
TCGA-DK-A3WX-01A	Basal	Basal	MC7	Ba/Sq	basal	Basal_squamous
TCGA-DK-A3WW-01A	Basal	Basal	MC7	Ba/Sq	basal	Basal_squamous
TCGA-XF-A9SK-01A	Differentiated	Basal	MC4	Uro-Inf	p53-like	Luminal_infiltrated
TCGA-KQ-A41R-01A	Differentiated	Luminal	MC1	UroC	luminal	Luminal_papillary
TCGA-CF-A3MG-01A	Differentiated	Luminal	MC1	UroA-Prog	luminal	Luminal_papillary
TCGA-CU-A0YR-01A	Differentiated	Luminal	MC1	UroC	luminal	Luminal
TCGA-UY-A78M-01A	Differentiated	Luminal	MC1	Uro-Inf	luminal	Luminal
TCGA-CF-A5UA-01A	Differentiated	Luminal	MC1	UroA-Prog	luminal	Luminal_papillary
TCGA-ZF-A9RN-01A	Differentiated	Basal	MC7	Sc/NE-like	p53-like	Basal_squamous
TCGA-4Z-AA81-01A	Differentiated	Basal	MC7	GU-Inf	luminal	Basal_squamous
TCGA-E7-A8O8-01A	Differentiated	Luminal	MC1	UroA-Prog	luminal	Luminal_papillary
TCGA-BL-A0C8-01B	Differentiated	Luminal	MC1	GU	p53-like	Luminal_papillary
TCGA-GC-A3RB-01A	Basal	Luminal	MC1	UroA-Prog	luminal	Luminal_papillary
TCGA-BT-A20O-01A	Differentiated	Basal	MC7	Mes-like	basal	Basal_squamous
TCGA-G2-A2ES-01A	Basal	Basal	MC7	Ba/Sq	basal	Basal_squamous
TCGA-DK-AA6P-01A	Differentiated	Luminal	MC1	UroA-Prog	luminal	Luminal_papillary
TCGA-FD-A43P-01A	Differentiated	Luminal	MC3	UroC	luminal	Luminal_infiltrated
TCGA-2F-A9KT-01A	Basal	Basal	MC7	Ba/Sq	luminal	Basal_squamous
TCGA-CF-A9FF-01A	Differentiated	Luminal	MC1	UroA-Prog	p53-like	Luminal_papillary
TCGA-UY-A9PA-01A	Differentiated	Luminal	MC1	UroA-Prog	luminal	Luminal_papillary
TCGA-E7-A7DU-01A	Differentiated	Luminal	MC1	UroA-Prog	luminal	Luminal_papillary
TCGA-2F-A9KW-01A	Differentiated	Luminal	MC3	GU-Inf	p53-like	Luminal
TCGA-4Z-AA87-01A	Differentiated	Luminal	MC3	UroC	luminal	Luminal
TCGA-GU-A42Q-01A	Basal	Basal	MC7	Ba/Sq	basal	Basal_squamous
TCGA-E7-A97P-01A	Basal	Basal	MC7	Ba/Sq	basal	Basal_squamous
TCGA-XF-AAMG-01A	Differentiated	Luminal	MC3	Sc/NE-like	luminal	Neuronal
TCGA-BT-A3PH-01A	Differentiated	Luminal	MC1	UroA-Prog	luminal	Luminal
TCGA-ZF-AA4R-01A	Differentiated	Basal	MC7	GU-Inf	luminal	Luminal_infiltrated
TCGA-ZF-AA5P-01A	Differentiated	Basal	MC4	Mes-like	p53-like	Luminal_infiltrated
TCGA-DK-A3X2-01A	Basal	Basal	MC7	UroB	luminal	Luminal_papillary
TCGA-YC-A8S6-01A	Differentiated	Basal	MC1	Uro-Inf	p53-like	Luminal_infiltrated
TCGA-K4-A4AB-01B	Differentiated	Basal	MC4	Uro-Inf	p53-like	Luminal_infiltrated
TCGA-GC-A3RC-01A	Basal	Basal	MC7	Ba/Sq	basal	Basal_squamous
TCGA-BL-A0C8-01A	Differentiated	Luminal	MC1	UroC	p53-like	Luminal
TCGA-GU-AATP-01A	Differentiated	Luminal	MC2	GU-Inf	luminal	Luminal_infiltrated
TCGA-CF-A1HS-01A	Basal	Basal	MC7	Ba/Sq	basal	Basal_squamous
TCGA-ZF-AA4U-01A	Differentiated	Luminal	MC1	UroA-Prog	luminal	Luminal_papillary
TCGA-GV-A3QF-01A	Differentiated	Luminal	MC1	UroA-Prog	luminal	Luminal_papillary
TCGA-GC-A4ZW-01A	Differentiated	Luminal	MC1	Sc/NE-like	luminal	Luminal_papillary
TCGA-ZF-A9RD-01A	Basal	Basal	MC7	Ba/Sq	basal	Basal_squamous
TCGA-GU-A766-01A	Basal	Basal	MC7	Ba/Sq-Inf	basal	Basal_squamous
TCGA-G2-A2EF-01A	Basal	Basal	MC7	Ba/Sq-Inf	basal	Basal_squamous
TCGA-FD-A5BY-01A	Basal	Basal	MC7	Ba/Sq	basal	Basal_squamous
TCGA-CF-A8HX-01A	Differentiated	Luminal	MC1	UroA-Prog	p53-like	Luminal_papillary
TCGA-GV-A6ZA-01A	Differentiated	Luminal	MC1	UroA-Prog	luminal	Luminal_papillary
TCGA-DK-A1A5-01A	Differentiated	Basal	MC7	Ba/Sq-Inf	p53-like	Luminal_infiltrated
TCGA-4Z-AA7N-01A	Differentiated	Basal	MC4	Uro-Inf	p53-like	Luminal_infiltrated
TCGA-GC-A3RD-01A	Differentiated	Luminal	MC1	UroA-Prog	luminal	Luminal_papillary
TCGA-G2-A3IE-01A	Differentiated	Luminal	MC1	UroA-Prog	luminal	Luminal_papillary
TCGA-FD-A5BZ-01A	Differentiated	Basal	MC4	Uro-Inf	p53-like	Luminal_infiltrated
TCGA-BT-A3PJ-01A	Basal	Basal	MC7	Ba/Sq	basal	Basal_squamous
TCGA-CU-A72E-01A	Basal	Basal	MC7	UroB	basal	Luminal_infiltrated
TCGA-ZF-A9RM-01A	Differentiated	Luminal	MC1	UroA-Prog	luminal	Luminal_papillary
TCGA-FD-A6TH-01A	Differentiated	Basal	MC7	GU-Inf	p53-like	Basal_squamous
TCGA-GD-A3OS-01A	Basal	Basal	MC7	Mes-like	basal	Neuronal
TCGA-DK-A3IS-01A	Differentiated	Luminal	MC1	UroA-Prog	luminal	Luminal_papillary
TCGA-K4-A3WS-01A	Differentiated	Basal	MC4	Uro-Inf	p53-like	Luminal_infiltrated
TCGA-4Z-AA7R-01A	Differentiated	Luminal	MC3	GU	luminal	Neuronal
TCGA-DK-A6B1-01A	Differentiated	Luminal	MC1	GU	p53-like	Luminal_papillary
TCGA-GV-A3QI-01A	Differentiated	Luminal	MC1	GU	p53-like	Luminal_papillary
TCGA-DK-A6AW-01A	Differentiated	Luminal	MC1	GU	luminal	Luminal_papillary
TCGA-BT-A20W-01A	Differentiated	Luminal	MC1	UroC	p53-like	Luminal
TCGA-DK-A3IU-01A	Basal	Basal	MC7	Ba/Sq-Inf	basal	Basal_squamous
TCGA-GC-A3YS-01A	Basal	Basal	MC7	Ba/Sq-Inf	basal	Basal_squamous
TCGA-4Z-AA7Q-01A	Basal	Basal	MC7	UroB	basal	Basal_squamous
TCGA-LT-A5Z6-01A	Differentiated	Luminal	MC1	GU	luminal	Luminal_papillary
TCGA-GC-A3I6-01A	Basal	Basal	MC7	Ba/Sq	basal	Basal_squamous
TCGA-E7-A5KF-01A	Differentiated	Luminal	MC1	UroA-Prog	luminal	Luminal_papillary
TCGA-DK-A3IM-01A	Basal	Basal	MC7	Ba/Sq	basal	Basal_squamous
TCGA-CF-A47X-01A	Differentiated	Luminal	MC1	UroA-Prog	luminal	Luminal_papillary
TCGA-BT-A2LA-01A	Differentiated	Basal	MC6	Sc/NE-like	p53-like	Neuronal
TCGA-GV-A3QK-01B	Differentiated	Luminal	MC1	UroA-Prog	luminal	Luminal_papillary
TCGA-FD-A6TD-01A	Basal	Basal	MC7	Ba/Sq-Inf	basal	Basal_squamous
TCGA-XF-AAMX-01A	Differentiated	Luminal	MC1	UroC	luminal	Luminal
TCGA-ZF-A9R5-01A	Differentiated	Luminal	MC1	UroA-Prog	p53-like	Luminal_papillary
TCGA-XF-A8HC-01A	Differentiated	Luminal	MC1	GU	luminal	Luminal_papillary
TCGA-ZF-A9RF-01A	Basal	Basal	MC7	Mes-like	p53-like	Basal_squamous
TCGA-H4-A2HO-01A	Differentiated	Luminal	MC1	UroC	p53-like	Luminal_papillary
TCGA-BT-A42E-01A	Basal	Basal	MC7	Ba/Sq	basal	Basal_squamous
TCGA-FD-A5BU-01A	Basal	Basal	MC7	Ba/Sq	basal	Basal_squamous
TCGA-XF-A9T6-01A	Basal	Basal	MC7	Ba/Sq	p53-like	Basal_squamous
TCGA-ZF-AA4T-01A	Differentiated	Luminal	MC3	UroC	luminal	Luminal_papillary
TCGA-FD-A3B6-01A	Basal	Basal	MC7	Ba/Sq-Inf	basal	Basal_squamous
TCGA-4Z-AA80-01A	Differentiated	Luminal	MC1	UroC	luminal	Luminal_papillary
TCGA-XF-A9SW-01A	Differentiated	Basal	MC4	Mes-like	p53-like	Luminal_infiltrated
TCGA-E7-A5KE-01A	Differentiated	Luminal	MC1	UroA-Prog	luminal	Luminal_papillary
TCGA-DK-AA6S-01A	Basal	Basal	MC7	Ba/Sq-Inf	basal	Basal_squamous
TCGA-FD-A5BR-01A	Differentiated	Luminal	MC1	Uro-Inf	luminal	Luminal_infiltrated
TCGA-FD-A6TC-01A	Differentiated	Basal	MC4	Uro-Inf	luminal	Luminal_infiltrated
TCGA-XF-AAN1-01A	Differentiated	Luminal	MC1	UroA-Prog	luminal	Luminal_papillary
TCGA-DK-A3IV-01A	Differentiated	Luminal	MC1	GU	luminal	Luminal_papillary
TCGA-PQ-A6FN-01A	Basal	Basal	MC7	Ba/Sq	basal	Basal_squamous
TCGA-K4-A5RI-01A	Basal	Basal	MC7	Ba/Sq	basal	Basal_squamous
TCGA-ZF-A9R7-01A	Differentiated	Luminal	MC1	UroB	luminal	Luminal_papillary
TCGA-XF-A9SM-01A	Basal	Basal	MC7	Ba/Sq-Inf	basal	Basal_squamous
TCGA-FD-A6TE-01A	Differentiated	Luminal	MC1	GU	luminal	Luminal_papillary
TCGA-XF-AAME-01A	Basal	Basal	MC7	Ba/Sq-Inf	p53-like	Basal_squamous
TCGA-BT-A42C-01A	Differentiated	Luminal	MC1	UroA-Prog	luminal	Luminal_papillary
TCGA-CF-A47Y-01A	Differentiated	Luminal	MC1	UroA-Prog	p53-like	Luminal_papillary
TCGA-E7-A519-01A	Differentiated	Luminal	MC1	Uro-Inf	p53-like	Luminal_papillary
TCGA-FD-A43Y-01A	Basal	Basal	MC7	Ba/Sq	basal	Basal_squamous
TCGA-BL-A5ZZ-01A	Differentiated	Basal	MC7	Mes-like	p53-like	Basal_squamous
TCGA-CF-A3MF-01A	Differentiated	Luminal	MC1	UroA-Prog	luminal	Luminal_papillary
TCGA-FD-A3B8-01A	Basal	Basal	MC7	Ba/Sq-Inf	p53-like	Basal_squamous
TCGA-BL-A13I-01B	Basal	Basal	MC7	Mes-like	p53-like	Basal_squamous
TCGA-DK-A1A7-01A	Differentiated	Luminal	MC1	UroC	p53-like	Luminal_papillary
TCGA-DK-A1A6-01A	Differentiated	Luminal	MC1	UroC	luminal	Luminal_papillary
TCGA-DK-A6B2-01A	Differentiated	Luminal	MC1	UroC	luminal	Luminal_infiltrated
TCGA-DK-AA74-01A	Basal	Basal	MC7	Ba/Sq-Inf	basal	Basal_squamous
TCGA-ZF-AA4N-01A	Basal	Basal	MC7	Ba/Sq-Inf	basal	Basal_squamous
TCGA-BT-A0YX-01A	Basal	Basal	MC7	Ba/Sq	basal	Basal_squamous
TCGA-R3-A69X-01A	Differentiated	Luminal	MC4	Uro-Inf	p53-like	Luminal_infiltrated
TCGA-XF-AAMW-01A	Basal	Basal	MC7	Ba/Sq	basal	Basal_squamous
TCGA-C4-A0EZ-01A	Differentiated	Basal	MC6	Sc/NE-like	basal	Neuronal
TCGA-E7-A678-01A	Differentiated	Luminal	MC1	UroA-Prog	p53-like	Luminal_papillary
TCGA-G2-A3IB-01A	Basal	Basal	MC7	Ba/Sq	basal	Basal_squamous
TCGA-BL-A13J-01B	Basal	Luminal	MC1	UroC	luminal	Luminal_infiltrated
TCGA-DK-A3IT-01A	Differentiated	Luminal	MC4	Uro-Inf	luminal	Luminal_infiltrated
TCGA-MV-A51V-01A	Differentiated	Luminal	MC1	GU	p53-like	Luminal_papillary
TCGA-UY-A78O-01A	Differentiated	Luminal	MC1	UroA-Prog	p53-like	Luminal
TCGA-FD-A6TK-01A	Basal	Basal	MC7	Ba/Sq-Inf	basal	Basal_squamous
TCGA-4Z-AA83-01A	Differentiated	Luminal	MC1	UroA-Prog	luminal	Luminal_papillary
TCGA-DK-A2I6-01A	Basal	Basal	MC7	Ba/Sq-Inf	basal	Basal_squamous
TCGA-XF-AAN4-01A	Basal	Basal	MC4	Mes-like	p53-like	Basal_squamous
TCGA-CF-A27C-01A	Differentiated	Luminal	MC1	UroA-Prog	luminal	Luminal_papillary
TCGA-5N-A9KM-01A	Differentiated	Luminal	MC1	UroC	p53-like	Luminal_infiltrated
TCGA-BT-A20U-01A	Basal	Basal	MC7	Ba/Sq	basal	Basal_squamous
TCGA-YC-A9TC-01A	Basal	Basal	MC7	Sc/NE-like	basal	Neuronal
TCGA-E7-A6MD-01A	Differentiated	Luminal	MC4	Uro-Inf	p53-like	Luminal_infiltrated
TCGA-K4-A5RH-01A	Differentiated	Basal	MC7	Mes-like	basal	Basal_squamous
TCGA-XF-AAMH-01A	Differentiated	Basal	MC7	Sc/NE-like	basal	Neuronal
TCGA-DK-A1AB-01A	Basal	Basal	MC7	Ba/Sq-Inf	basal	Basal_squamous
TCGA-E5-A4TZ-01A	Differentiated	Luminal	MC7	UroB	luminal	Luminal_papillary
TCGA-FD-A43X-01A	Differentiated	Luminal	MC1	UroA-Prog	p53-like	Luminal_papillary
TCGA-XF-A9SU-01A	Differentiated	Luminal	MC1	Uro-Inf	p53-like	Luminal_infiltrated
TCGA-BT-A20N-01A	Basal	Luminal	MC1	UroA-Prog	luminal	Luminal_papillary
TCGA-BT-A20J-01A	Differentiated	Basal	MC7	Sc/NE-like	p53-like	Basal_squamous
TCGA-E7-A4IJ-01A	Differentiated	Luminal	MC1	GU	luminal	Luminal_papillary
TCGA-CF-A47W-01A	Differentiated	Luminal	MC1	UroA-Prog	p53-like	Luminal_papillary
TCGA-XF-A9SV-01A	Differentiated	Luminal	MC1	UroC	p53-like	Luminal
TCGA-K4-AAQO-01A	Differentiated	Luminal	MC4	Uro-Inf	p53-like	Luminal_infiltrated
TCGA-CU-A3YL-01A	Differentiated	Luminal	MC1	UroA-Prog	p53-like	Luminal_papillary
TCGA-DK-A2I2-01A	Basal	Basal	MC7	Ba/Sq-Inf	basal	Basal_squamous
TCGA-4Z-AA84-01A	Basal	Basal	MC7	GU-Inf	p53-like	Basal_squamous
TCGA-DK-A1AF-01A	Differentiated	Basal	MC4	Uro-Inf	p53-like	Luminal_infiltrated
TCGA-E5-A4U1-01A	Differentiated	Luminal	MC1	UroA-Prog	luminal	Luminal_papillary
TCGA-BT-A20Q-01A	Differentiated	Basal	MC4	Uro-Inf	p53-like	Luminal_infiltrated
TCGA-ZF-A9R4-01A	Differentiated	Luminal	MC1	UroC	luminal	Luminal_papillary
TCGA-KQ-A41Q-01A	Differentiated	Luminal	MC1	UroC	luminal	Luminal_papillary
TCGA-E7-A8O7-01A	Differentiated	Luminal	MC1	UroA-Prog	luminal	Luminal_papillary
TCGA-ZF-AA4W-01A	Basal	Basal	MC7	Ba/Sq	basal	Basal_squamous
TCGA-XF-AAN7-01A	Differentiated	Basal	MC6	Sc/NE-like	p53-like	Neuronal
TCGA-XF-A8HH-01A	Differentiated	Luminal	MC1	UroC	p53-like	Luminal
TCGA-FD-A5BX-01A	Differentiated	Basal	MC4	Mes-like	p53-like	Basal_squamous
TCGA-ZF-A9RE-01A	Differentiated	Basal	MC7	UroB	luminal	Luminal_papillary
TCGA-FT-A3EE-01A	Differentiated	Basal	MC7	UroA-Prog	luminal	Luminal_papillary
TCGA-XF-A9T5-01A	Basal	Basal	MC7	Mes-like	basal	Basal_squamous
TCGA-XF-AAML-01A	Differentiated	Luminal	MC1	GU	luminal	Luminal_papillary
TCGA-BT-A3PK-01A	Basal	Basal	MC7	Ba/Sq	basal	Basal_squamous
TCGA-CF-A3MI-01A	Differentiated	Luminal	MC1	UroA-Prog	luminal	Luminal_papillary
TCGA-E7-A541-01A	Differentiated	Luminal	MC1	GU	luminal	Luminal_papillary
TCGA-ZF-AA54-01A	Differentiated	Basal	MC7	Mes-like	basal	Basal_squamous
TCGA-XF-AAMZ-01A	Differentiated	Luminal	MC1	UroC	luminal	Luminal
TCGA-CF-A8HY-01A	Differentiated	Luminal	MC1	UroA-Prog	luminal	Luminal_papillary
TCGA-GV-A3QG-01A	Differentiated	Basal	MC4	GU-Inf	p53-like	Luminal_infiltrated
TCGA-DK-A6B6-01A	Differentiated	Luminal	MC1	UroC	luminal	Luminal_papillary
TCGA-DK-A6B0-01A	Differentiated	Luminal	MC1	UroA-Prog	p53-like	Luminal_papillary
TCGA-E7-A97Q-01A	Differentiated	Luminal	MC1	UroC	p53-like	Luminal
TCGA-2F-A9KP-01A	Differentiated	Luminal	MC1	UroA-Prog	luminal	Luminal_papillary
TCGA-FD-A62P-01A	Differentiated	Basal	MC7	Ba/Sq-Inf	luminal	Luminal_infiltrated
TCGA-XF-A8HG-01A	Differentiated	Luminal	MC1	UroA-Prog	luminal	Luminal_papillary
TCGA-4Z-AA86-01A	Basal	Basal	MC7	Ba/Sq-Inf	basal	Basal_squamous
TCGA-GD-A6C6-01A	Differentiated	Luminal	MC1	UroA-Prog	p53-like	Luminal_papillary
TCGA-G2-A2EJ-01A	Basal	Basal	MC7	Ba/Sq	basal	Basal_squamous
TCGA-UY-A9PD-01A	Differentiated	Luminal	MC3	UroC	luminal	Luminal
TCGA-S5-A6DX-01A	Differentiated	Luminal	MC1	Uro-Inf	p53-like	Luminal_infiltrated
TCGA-FD-A3SQ-01A	Differentiated	Basal	MC4	Uro-Inf	p53-like	Luminal_infiltrated
TCGA-DK-AA77-01A	Differentiated	Luminal	MC1	UroA-Prog	luminal	Luminal_papillary
TCGA-BL-A13I-01A	Differentiated	Basal	MC7	Mes-like	basal	Basal_squamous
TCGA-K4-A6MB-01A	Differentiated	Luminal	MC1	GU-Inf	luminal	Luminal
TCGA-ZF-AA51-01A	Differentiated	Luminal	MC1	UroC	luminal	Luminal_infiltrated
TCGA-E7-A7PW-01A	Differentiated	Luminal	MC1	UroA-Prog	luminal	Luminal_papillary
TCGA-E7-A85H-01A	Differentiated	Luminal	MC3	UroC	luminal	Luminal
TCGA-XF-AAMR-01A	Differentiated	Basal	MC4	Uro-Inf	p53-like	Luminal_infiltrated
TCGA-FD-A6TG-01A	Differentiated	Luminal	MC4	Uro-Inf	p53-like	Luminal_infiltrated
TCGA-2F-A9KO-01A	Differentiated	Luminal	MC1	Uro-Inf	p53-like	Luminal_infiltrated
TCGA-HQ-A5ND-01A	Basal	Basal	MC7	UroB	basal	Basal_squamous
TCGA-G2-AA3B-01A	Differentiated	Luminal	MC1	UroA-Prog	luminal	Luminal_papillary
TCGA-PQ-A6FI-01A	Basal	Basal	MC7	Ba/Sq	basal	Basal_squamous
TCGA-C4-A0F7-01A	Differentiated	Basal	MC7	Ba/Sq	basal	Basal_squamous
TCGA-FD-A5BS-01A	Differentiated	Basal	MC4	Mes-like	basal	Basal_squamous
TCGA-GV-A3JX-01A	Differentiated	Luminal	MC1	GU	luminal	Luminal_papillary
TCGA-XF-AAMT-01A	Basal	Basal	MC7	Ba/Sq-Inf	basal	Basal_squamous
TCGA-XF-A9T8-01A	Basal	Basal	MC7	Ba/Sq	basal	Basal_squamous
TCGA-4Z-AA7S-01A	Differentiated	Luminal	MC1	UroA-Prog	p53-like	Luminal_papillary
TCGA-XF-A9SH-01A	Differentiated	Luminal	MC1	UroA-Prog	p53-like	Luminal_papillary
TCGA-DK-A1AG-01A	Differentiated	Luminal	MC1	UroA-Prog	p53-like	Luminal_papillary
TCGA-2F-A9KR-01A	Differentiated	Basal	MC7	UroB	p53-like	Luminal_papillary
TCGA-DK-AA6U-01A	Differentiated	Luminal	MC1	GU	luminal	Luminal_papillary
TCGA-C4-A0F6-01A	Differentiated	Luminal	MC1	UroA-Prog	luminal	Luminal
TCGA-K4-A3WU-01B	Differentiated	Luminal	MC4	Uro-Inf	p53-like	Luminal_infiltrated
TCGA-CU-A0YN-01A	Basal	Basal	MC7	Ba/Sq	basal	Basal_squamous
TCGA-FJ-A871-01A	Differentiated	Basal	MC7	Mes-like	p53-like	Neuronal
TCGA-G2-A2EC-01A	Differentiated	Luminal	MC1	Uro-Inf	p53-like	Luminal_infiltrated
TCGA-FD-A5BV-01A	Differentiated	Luminal	MC1	UroA-Prog	p53-like	Luminal_papillary
TCGA-E7-A7XN-01A	Basal	Basal	MC7	Ba/Sq	basal	Basal_squamous
TCGA-GU-A764-01A	Basal	Basal	MC7	Ba/Sq-Inf	basal	Basal_squamous
TCGA-XF-AAN8-01A	Basal	Basal	MC4	Mes-like	p53-like	Basal_squamous
TCGA-XF-A9SZ-01A	Differentiated	Basal	MC1	GU-Inf	luminal	Luminal_infiltrated
TCGA-GU-AATO-01A	Differentiated	Basal	MC1	GU-Inf	luminal	Luminal_infiltrated
TCGA-ZF-A9RC-01A	Differentiated	Luminal	MC1	Uro-Inf	p53-like	Luminal
TCGA-ZF-A9R0-01A	Differentiated	Luminal	MC1	UroC	p53-like	Luminal
TCGA-KQ-A41P-01A	Differentiated	Luminal	MC1	Uro-Inf	p53-like	Luminal_infiltrated
TCGA-4Z-AA7W-01A	Differentiated	Basal	MC7	Ba/Sq-Inf	basal	Basal_squamous
TCGA-HQ-A5NE-01A	Basal	Basal	MC7	Ba/Sq	basal	Basal_squamous
TCGA-CU-A3KJ-01A	Basal	Basal	MC7	Ba/Sq	basal	Basal_squamous
TCGA-UY-A8OC-01A	Basal	Basal	MC7	Ba/Sq-Inf	basal	Basal_squamous
TCGA-E7-A3Y1-01A	Differentiated	Luminal	MC1	UroA-Prog	p53-like	Luminal_papillary
TCGA-XF-AAN5-01A	Basal	Basal	MC7	Ba/Sq-Inf	basal	Basal_squamous
TCGA-G2-AA3D-01A	Differentiated	Luminal	MC1	UroA-Prog	luminal	Luminal_papillary
TCGA-GU-A42R-01A	Differentiated	Luminal	MC1	UroA-Prog	luminal	Luminal_papillary
TCGA-XF-A9SI-01A	Differentiated	Basal	MC4	Mes-like	p53-like	Basal_squamous
TCGA-GV-A3JZ-01A	Differentiated	Luminal	MC3	GU-Inf	luminal	Luminal

## Sheet: Table S2
Table 2. The Molecular Classification of Bladder Cancer using IMvigor210 data.
ID	Baylor.subtype	UNC.subtype	CIT.subtype	Lund.subtype	MDA.subtype	TCGA.subtype
SAMf2ce197162ce	Differentiated	Luminal	MC5	Uro-Inf	p53-like	Luminal_infiltrated
SAM698d8d76b934	Basal	Basal	MC7	Sc/NE-like	basal	Neuronal
SAMc1b27bc16435	Differentiated	Luminal	MC1	UroC	luminal	Luminal
SAM85e41e7f33f9	Basal	Basal	MC7	Ba/Sq-Inf	basal	Basal_squamous
SAMf275eb859a39	Basal	Luminal	MC1	UroB	p53-like	Luminal_papillary
SAM7f0d9cc7f001	Differentiated	Luminal	MC4	GU-Inf	p53-like	Luminal_infiltrated
SAM4305ab968b90	Differentiated	Luminal	MC1	UroA-Prog	luminal	Luminal_papillary
SAMcf018fee2acd	Differentiated	Luminal	MC1	UroA-Prog	p53-like	Luminal_infiltrated
SAMb2f1d0e54ece	Basal	Basal	MC4	Mes-like	basal	Basal_squamous
SAMcc4675f394a1	Differentiated	Luminal	MC5	Uro-Inf	p53-like	Luminal_infiltrated
SAM49f9b2e57aa5	Basal	Luminal	MC1	UroA-Prog	luminal	Luminal
SAM2e7aa8fa0ab3	Differentiated	Luminal	MC2	UroC	luminal	Luminal
SAMd0e47be700b0	Differentiated	Luminal	MC1	UroA-Prog	luminal	Luminal_papillary
SAMdf3e42c8672a	Basal	Basal	MC7	Ba/Sq	basal	Basal_squamous
SAMd027124354ce	Basal	Basal	MC7	Ba/Sq-Inf	basal	Basal_squamous
SAM36d87392593b	Basal	Basal	MC7	Ba/Sq	basal	Basal_squamous
SAM4edbe45817b3	Basal	Basal	MC7	Ba/Sq	basal	Basal_squamous
SAM36a9225b0222	Basal	Basal	MC4	Mes-like	basal	Basal_squamous
SAMe7bf6c015192	Basal	Basal	MC7	UroB	basal	Basal_squamous
SAM6dd7ad1d797d	Basal	Basal	MC7	Ba/Sq-Inf	basal	Basal_squamous
SAMc0d625a50eb8	Differentiated	Basal	MC4	Mes-like	p53-like	Luminal_infiltrated
SAM18039827e1b9	Differentiated	Luminal	MC1	GU	luminal	Luminal_papillary
SAM681e4bf7cf85	Differentiated	Luminal	MC5	UroA-Prog	p53-like	Luminal
SAMc692536a795a	Differentiated	Luminal	MC4	Uro-Inf	p53-like	Luminal_infiltrated
SAM9a2cf3c06fb3	Differentiated	Luminal	MC4	Mes-like	p53-like	Luminal_infiltrated
SAM557dde1b9f3e	Differentiated	Luminal	MC5	UroC	p53-like	Luminal_infiltrated
SAMb8f13a0525a6	Basal	Basal	MC7	Sc/NE-like	basal	Neuronal
SAM23aa15d4a0b0	Differentiated	Luminal	MC5	UroC	luminal	Luminal_infiltrated
SAM468a9e1dc821	Basal	Basal	MC7	Ba/Sq	basal	Basal_squamous
SAM81b71522417a	Differentiated	Luminal	MC1	UroA-Prog	luminal	Luminal_papillary
SAM6cb230f208a8	Differentiated	Luminal	MC2	UroC	p53-like	Luminal
SAM0684af734db1	Differentiated	Luminal	MC1	UroA-Prog	luminal	Luminal_papillary
SAMb963dda93cfd	Basal	Basal	MC7	Ba/Sq-Inf	basal	Basal_squamous
SAMa9ca8536d2b1	Basal	Basal	MC4	Mes-like	p53-like	Luminal_infiltrated
SAM9fb814c22bdb	Basal	Basal	MC4	Mes-like	basal	Basal_squamous
SAMbcbc7957c264	Basal	Luminal	MC1	UroA-Prog	luminal	Luminal_papillary
SAM7fb6987514a4	Basal	Basal	MC7	Ba/Sq-Inf	basal	Basal_squamous
SAM63405b04ab2d	Differentiated	Basal	MC4	Ba/Sq-Inf	p53-like	Luminal_infiltrated
SAM18bc1078bc15	Differentiated	Luminal	MC1	GU	luminal	Luminal_infiltrated
SAM7d2dfba6cd84	Basal	Basal	MC4	Mes-like	basal	Basal_squamous
SAMd1bd63734394	Basal	Basal	MC7	Ba/Sq	basal	Basal_squamous
SAMe9ae8beb82fa	Basal	Luminal	MC4	Uro-Inf	p53-like	Luminal_infiltrated
SAMb0a83e5fbde9	Differentiated	Luminal	MC1	UroA-Prog	p53-like	Luminal_papillary
SAMba7176afe070	Basal	Luminal	MC1	UroA-Prog	luminal	Luminal_papillary
SAMae1690469964	Differentiated	Luminal	MC1	UroA-Prog	luminal	Luminal_papillary
SAMbe83eae4026e	Basal	Luminal	MC5	UroA-Prog	luminal	Luminal_infiltrated
SAMe5bc41772bc9	Basal	Basal	MC7	Ba/Sq	basal	Basal_squamous
SAM23095936e611	Differentiated	Luminal	MC1	UroA-Prog	luminal	Luminal
SAM7114d99032ec	Differentiated	Luminal	MC5	UroC	p53-like	Luminal
SAMd215b503f99a	Basal	Basal	MC4	Ba/Sq-Inf	p53-like	Luminal_infiltrated
SAMdb3f50c9129c	Basal	Basal	MC4	Sc/NE-like	p53-like	Luminal_infiltrated
SAMbf1a3ae828e6	Differentiated	Luminal	MC4	GU-Inf	p53-like	Luminal_infiltrated
SAM52e3fa3ad574	Basal	Basal	MC4	Mes-like	p53-like	Luminal_infiltrated
SAMd4c0837b0997	Basal	Basal	MC7	UroB	luminal	Basal_squamous
SAM9cafb905b36a	Basal	Basal	MC7	Mes-like	basal	Basal_squamous
SAM3f2033c90438	Basal	Basal	MC7	GU-Inf	basal	Basal_squamous
SAM032c642382a7	Basal	Basal	MC7	GU-Inf	p53-like	Basal_squamous
SAM5ffd7e4cd794	Differentiated	Luminal	MC1	GU	luminal	Luminal_infiltrated
SAMb419a8fcbfcd	Basal	Basal	MC7	Sc/NE-like	luminal	Neuronal
SAM8884fe446d20	Basal	Basal	MC7	Ba/Sq-Inf	basal	Basal_squamous
SAM17c45bf16bb6	Differentiated	Luminal	MC1	UroA-Prog	luminal	Luminal_papillary
SAM2070b416069c	Basal	Luminal	MC7	UroB	basal	Luminal_papillary
SAM0ce9c983b20f	Basal	Basal	MC7	Ba/Sq	basal	Basal_squamous
SAMa1e62d323e1d	Differentiated	Luminal	MC4	UroC	p53-like	Luminal_infiltrated
SAM61baf919bb01	Differentiated	Basal	MC4	Uro-Inf	p53-like	Luminal_infiltrated
SAM97a00e0929fb	Differentiated	Luminal	MC3	GU	luminal	Luminal
SAM2f228939632f	Basal	Basal	MC4	Mes-like	p53-like	Luminal_infiltrated
SAM9539a4f19ebc	Basal	Luminal	MC1	UroA-Prog	luminal	Luminal_papillary
SAM36851bc8b9ae	Basal	Luminal	MC1	UroA-Prog	p53-like	Luminal_papillary
SAM297c0301e861	Basal	Basal	MC4	Mes-like	basal	Basal_squamous
SAM1fa6bcb7fc48	Differentiated	Luminal	MC1	UroA-Prog	luminal	Luminal_papillary
SAM075e037d95bc	Differentiated	Luminal	MC1	UroA-Prog	luminal	Luminal_papillary
SAM6d2ae0c39b96	Differentiated	Luminal	MC1	UroB	luminal	Luminal_papillary
SAMcabb6d58ff55	Basal	Basal	MC7	GU-Inf	basal	Basal_squamous
SAM716f54e468f4	Basal	Luminal	MC5	UroC	p53-like	Luminal_infiltrated
SAMeff2ce356ccb	Differentiated	Luminal	MC1	UroA-Prog	luminal	Luminal_papillary
SAM110501d0eedb	Differentiated	Luminal	MC4	UroC	luminal	Luminal_infiltrated
SAM2e9ac0b1b250	Basal	Basal	MC7	Mes-like	p53-like	Basal_squamous
SAMc0ef41aa6c8b	Differentiated	Luminal	MC1	UroA-Prog	p53-like	Luminal_papillary
SAMd636e3461955	Basal	Basal	MC4	Mes-like	basal	Luminal_infiltrated
SAMe712352fb82a	Differentiated	Luminal	MC1	GU	luminal	Luminal
SAM30b5c6c54cf7	Basal	Basal	MC7	Ba/Sq	basal	Basal_squamous
SAMd98bac0a070f	Basal	Luminal	MC7	UroB	basal	Luminal_infiltrated
SAM8e8ef2368dfa	Basal	Basal	MC4	Ba/Sq-Inf	p53-like	Luminal_infiltrated
SAM08cce2fa88f2	Differentiated	Luminal	MC1	UroA-Prog	luminal	Luminal_papillary
SAMb4c7a001537d	Differentiated	Luminal	MC1	UroC	luminal	Luminal_papillary
SAMfd947610629d	Differentiated	Luminal	MC4	Uro-Inf	p53-like	Luminal_infiltrated
SAM943df5cf15df	Basal	Basal	MC7	Ba/Sq	basal	Basal_squamous
SAM31f41dd0d6ca	Basal	Basal	MC7	UroB	basal	Luminal_infiltrated
SAMb3c02294aba7	Differentiated	Luminal	MC7	GU-Inf	luminal	Luminal_papillary
SAM39eb94fa504d	Basal	Basal	MC7	Ba/Sq	basal	Basal_squamous
SAM62fb1388c871	Differentiated	Luminal	MC3	UroC	luminal	Luminal
SAMc0da5d48686d	Basal	Basal	MC7	GU-Inf	p53-like	Luminal_infiltrated
SAMe7bcab05402e	Differentiated	Luminal	MC4	Uro-Inf	p53-like	Luminal_infiltrated
SAM2570ff4aae6e	Differentiated	Basal	MC7	UroB	basal	Luminal_infiltrated
SAM2dc3f04e45e9	Basal	Basal	MC7	Sc/NE-like	p53-like	Basal_squamous
SAM9448d858692c	Basal	Basal	MC4	GU-Inf	p53-like	Luminal_infiltrated
SAM4501e41e4751	Basal	Basal	MC7	Ba/Sq	basal	Basal_squamous
SAM714285adf612	Basal	Basal	MC7	Mes-like	basal	Basal_squamous
SAM5b57e47fdcb3	Differentiated	Luminal	MC1	UroB	luminal	Luminal_infiltrated
SAMae4da274eded	Differentiated	Luminal	MC1	UroC	luminal	Luminal_infiltrated
SAMd35318127278	Basal	Luminal	MC1	UroA-Prog	luminal	Luminal_papillary
SAMa913c6139ec8	Basal	Luminal	MC4	GU-Inf	p53-like	Luminal_infiltrated
SAM75142fcab9df	Basal	Basal	MC4	UroB	p53-like	Luminal_infiltrated
SAMd697ba701077	Differentiated	Luminal	MC4	UroA-Prog	p53-like	Luminal_infiltrated
SAM166a419a4e5a	Basal	Basal	MC4	Mes-like	p53-like	Luminal_infiltrated
SAM025b45c27e05	Basal	Basal	MC4	Ba/Sq-Inf	basal	Luminal_infiltrated
SAMe07c4560772d	Differentiated	Luminal	MC1	UroA-Prog	luminal	Luminal_papillary
SAM2dc578e0165f	Differentiated	Luminal	MC7	GU-Inf	luminal	Luminal_infiltrated
SAM3785587846ce	Differentiated	Luminal	MC1	UroA-Prog	luminal	Luminal_papillary
SAM560f23d6a3ad	Basal	Basal	MC7	Sc/NE-like	basal	Basal_squamous
SAM52500cabdd36	Differentiated	Luminal	MC1	GU	luminal	Luminal
SAM14df63a65411	Basal	Luminal	MC7	UroB	basal	Luminal_infiltrated
SAMf3a9bce50099	Differentiated	Luminal	MC5	Uro-Inf	luminal	Luminal_infiltrated
SAMffa5c7cad0e5	Basal	Basal	MC4	Mes-like	basal	Luminal_infiltrated
SAMdab9ca8fb5de	Differentiated	Luminal	MC4	UroA-Prog	p53-like	Luminal_infiltrated
SAM34430ef08e5b	Differentiated	Basal	MC4	Mes-like	p53-like	Luminal_infiltrated
SAM4b0175e8db6e	Basal	Basal	MC4	Uro-Inf	p53-like	Luminal_infiltrated
SAMf28c01545593	Differentiated	Luminal	MC1	UroA-Prog	luminal	Luminal_papillary
SAMaec7380f9ab0	Differentiated	Basal	MC6	Sc/NE-like	p53-like	Neuronal
SAMaf7578d55754	Differentiated	Luminal	MC4	GU-Inf	p53-like	Luminal_infiltrated
SAMbd8ee73983b8	Differentiated	Luminal	MC5	UroC	p53-like	Luminal_infiltrated
SAMe94c30c30616	Differentiated	Luminal	MC5	Uro-Inf	luminal	Luminal_infiltrated
SAM54e58f1b0230	Differentiated	Luminal	MC1	UroA-Prog	luminal	Luminal_papillary
SAM5e3bae090b8c	Differentiated	Luminal	MC1	GU	luminal	Luminal_infiltrated
SAM3cb94b0d5297	Differentiated	Luminal	MC2	UroC	p53-like	Luminal_infiltrated
SAM61b9d4d84c64	Differentiated	Luminal	MC1	UroC	luminal	Luminal_papillary
SAM8a42c0d59187	Differentiated	Luminal	MC1	UroA-Prog	luminal	Luminal
SAMcb132b0cdd2c	Differentiated	Luminal	MC5	GU-Inf	luminal	Luminal_infiltrated
SAMe97af0feefdf	Basal	Luminal	MC1	UroB	p53-like	Luminal_infiltrated
SAMee3844cc0b9f	Basal	Basal	MC4	Mes-like	p53-like	Luminal_infiltrated
SAM73b653ae20d1	Basal	Basal	MC7	Ba/Sq-Inf	basal	Basal_squamous
SAMdcae54fcd7fa	Differentiated	Luminal	MC4	GU-Inf	p53-like	Luminal_infiltrated
SAMdad5c29dc105	Differentiated	Luminal	MC5	UroA-Prog	p53-like	Luminal
SAMa424c75831b4	Differentiated	Luminal	MC7	UroB	luminal	Luminal_infiltrated
SAM28687037e4ff	Basal	Basal	MC7	Ba/Sq-Inf	basal	Basal_squamous
SAMe50d15fde368	Differentiated	Luminal	MC1	UroA-Prog	luminal	Luminal_papillary
SAM45c8e6412c66	Basal	Basal	MC7	Ba/Sq	basal	Basal_squamous
SAM8533e5e261d6	Basal	Luminal	MC1	UroB	luminal	Luminal_papillary
SAMaaf505c36f93	Differentiated	Luminal	MC1	UroC	p53-like	Luminal
SAM73663ee4a96e	Differentiated	Luminal	MC2	UroC	luminal	Luminal_infiltrated
SAM0bdb3428bd13	Differentiated	Basal	MC5	Mes-like	p53-like	Luminal_infiltrated
SAM3330c03fdf00	Basal	Basal	MC4	Mes-like	p53-like	Basal_squamous
SAM0a7c2091dd56	Basal	Basal	MC7	Ba/Sq	basal	Basal_squamous
SAM7bff231634e9	Basal	Basal	MC7	Ba/Sq	basal	Basal_squamous
SAM5d1dfd5207f5	Differentiated	Luminal	MC1	UroA-Prog	luminal	Luminal_papillary
SAMeb587a68006b	Differentiated	Basal	MC4	Mes-like	p53-like	Luminal_infiltrated
SAM99a46b9eec27	Basal	Basal	MC4	Ba/Sq-Inf	p53-like	Basal_squamous
SAM1ac4e3dee297	Differentiated	Luminal	MC1	UroA-Prog	luminal	Luminal_papillary
SAM553c3c35b847	Basal	Basal	MC7	Mes-like	basal	Basal_squamous
SAM3e04eb914f3d	Differentiated	Basal	MC4	Uro-Inf	luminal	Luminal_infiltrated
SAMc2a1820d4e6b	Differentiated	Luminal	MC4	Uro-Inf	p53-like	Luminal_infiltrated
SAM822b226466a1	Differentiated	Luminal	MC1	UroA-Prog	p53-like	Luminal_papillary
SAMabc151b01ea3	Differentiated	Basal	MC7	GU-Inf	basal	Luminal_infiltrated
SAMe1eb5d988760	Basal	Basal	MC4	Ba/Sq-Inf	p53-like	Luminal_infiltrated
SAMe3210d3632b4	Basal	Basal	MC7	Ba/Sq	basal	Basal_squamous
SAMb15ad09d6e24	Basal	Basal	MC4	Mes-like	basal	Basal_squamous
SAM7893196e0e89	Basal	Basal	MC7	Ba/Sq	basal	Basal_squamous
SAM3f446449bf81	Basal	Basal	MC7	UroB	basal	Basal_squamous
SAM961d04c42bd9	Differentiated	Luminal	MC5	UroC	luminal	Luminal_infiltrated
SAMb0d11db9aa79	Basal	Basal	MC7	UroB	luminal	Basal_squamous
SAM19fec8f3b3bd	Basal	Basal	MC7	Ba/Sq-Inf	basal	Basal_squamous
SAM6083aac8db99	Differentiated	Luminal	MC7	GU	luminal	Luminal_infiltrated
SAM7ee2b6e4d6b3	Differentiated	Luminal	MC1	UroA-Prog	luminal	Luminal_papillary
SAMa90d73f8d891	Basal	Basal	MC7	Ba/Sq	basal	Basal_squamous
SAMaff272833538	Differentiated	Luminal	MC5	UroC	luminal	Luminal_infiltrated
SAM415f36ad349e	Basal	Basal	MC7	Mes-like	basal	Basal_squamous
SAM7c67b05aa109	Differentiated	Luminal	MC1	UroA-Prog	luminal	Luminal_papillary
SAMad83c9c53537	Basal	Basal	MC4	Ba/Sq-Inf	p53-like	Luminal_infiltrated
SAM3e8baff50d7a	Basal	Luminal	MC3	GU	p53-like	Luminal_papillary
SAM3ee5dcd894f0	Differentiated	Luminal	MC5	Uro-Inf	basal	Luminal_infiltrated
SAM8a1b0e02ee42	Differentiated	Luminal	MC3	GU-Inf	p53-like	Neuronal
SAMd7d57ee3a863	Basal	Basal	MC7	Mes-like	basal	Basal_squamous
SAMeb29625f76a5	Differentiated	Luminal	MC1	UroA-Prog	p53-like	Luminal
SAM563d6233dfa2	Basal	Basal	MC7	Ba/Sq-Inf	basal	Basal_squamous
SAM4581bac493af	Differentiated	Luminal	MC1	GU-Inf	p53-like	Basal_squamous
SAMa1871f491b02	Differentiated	Luminal	MC1	UroB	luminal	Luminal_papillary
SAM30cf07d4874f	Basal	Basal	MC4	Mes-like	p53-like	Luminal_infiltrated
SAM31291c256373	Differentiated	Basal	MC4	GU-Inf	p53-like	Luminal_infiltrated
SAMd135d5867fe3	Basal	Basal	MC7	Mes-like	basal	Basal_squamous
SAM9e11ec6bea80	Basal	Basal	MC7	GU-Inf	basal	Basal_squamous
SAM065890737112	Differentiated	Luminal	MC1	UroC	luminal	Luminal_papillary
SAMb470eb8f04be	Basal	Luminal	MC1	UroB	luminal	Luminal_infiltrated
SAM675a12a09c15	Basal	Luminal	MC4	Uro-Inf	p53-like	Luminal_infiltrated
SAM1e9c4d1d39ae	Basal	Basal	MC7	Ba/Sq	basal	Basal_squamous
SAM5a2347c0498a	Differentiated	Luminal	MC1	GU	luminal	Luminal_papillary
SAM0571f17f4045	Differentiated	Basal	MC7	Sc/NE-like	p53-like	Basal_squamous
SAM4b7ea015fd9e	Differentiated	Luminal	MC1	UroA-Prog	luminal	Luminal_papillary
SAM9306c5c92444	Differentiated	Luminal	MC1	GU	luminal	Luminal_papillary
SAMb15ac6e4c4ef	Differentiated	Luminal	MC2	UroC	luminal	Luminal_infiltrated
SAM28e6031ac18b	Differentiated	Luminal	MC1	UroA-Prog	luminal	Luminal_papillary
SAMd86389d0d768	Differentiated	Luminal	MC1	UroA-Prog	luminal	Luminal_papillary
SAM63b2189c36d7	Differentiated	Luminal	MC1	UroA-Prog	luminal	Luminal_papillary
SAM18be5b395318	Differentiated	Luminal	MC1	GU	luminal	Luminal_infiltrated
SAM0d855cff64e6	Basal	Basal	MC7	Ba/Sq	basal	Basal_squamous
SAM6cbc10abddb0	Basal	Basal	MC7	Ba/Sq	basal	Basal_squamous
SAMdee1011782cd	Basal	Basal	MC4	Mes-like	p53-like	Luminal_infiltrated
SAMe9475f77504b	Basal	Basal	MC4	Mes-like	p53-like	Luminal_infiltrated
SAMa535fcdf18a0	Differentiated	Luminal	MC1	UroA-Prog	luminal	Luminal
SAM7746b76437e6	Differentiated	Luminal	MC1	UroA-Prog	luminal	Luminal_papillary
SAM548551ef782c	Differentiated	Luminal	MC3	GU-Inf	p53-like	Luminal
SAM203dcf14f927	Basal	Luminal	MC1	GU	luminal	Luminal_infiltrated
SAMe41b1e773582	Basal	Basal	MC7	Ba/Sq	basal	Basal_squamous
SAM978a587b207e	Differentiated	Basal	MC7	GU-Inf	p53-like	Luminal_infiltrated
SAM5234688806a7	Differentiated	Luminal	MC1	UroA-Prog	luminal	Luminal_papillary
SAM2c9586161ce6	Differentiated	Luminal	MC1	UroA-Prog	luminal	Luminal_papillary
SAM76a431ba6ce1	Basal	Basal	MC4	Ba/Sq-Inf	basal	Luminal_infiltrated
SAM7a9093b9c7e9	Basal	Basal	MC4	Mes-like	p53-like	Luminal_infiltrated
SAM8f2275c36e8c	Differentiated	Luminal	MC1	UroA-Prog	p53-like	Luminal_papillary
SAMab8052a03398	Basal	Basal	MC4	Mes-like	basal	Basal_squamous
SAMd3bd67996035	Differentiated	Luminal	MC3	UroC	luminal	Luminal_infiltrated
SAMfddc359e862b	Differentiated	Luminal	MC4	UroC	p53-like	Luminal_infiltrated
SAM753d4bb52dbe	Differentiated	Luminal	MC4	UroC	p53-like	Luminal_infiltrated
SAMd3601288319e	Differentiated	Luminal	MC3	GU	luminal	Luminal_infiltrated
SAM59f392864f5d	Differentiated	Basal	MC4	GU-Inf	p53-like	Luminal_infiltrated
SAM26104d5adc89	Differentiated	Luminal	MC4	Uro-Inf	p53-like	Luminal_infiltrated
SAMba1a34b5a060	Basal	Basal	MC7	Ba/Sq-Inf	basal	Basal_squamous
SAM18a4dabbc557	Differentiated	Luminal	MC3	GU	p53-like	Luminal
SAMfb7aec7cb0e2	Basal	Basal	MC7	GU-Inf	basal	Basal_squamous
SAMfed609955db9	Basal	Luminal	MC4	UroB	basal	Luminal_infiltrated
SAMb8070b7937e7	Differentiated	Luminal	MC1	UroA-Prog	luminal	Luminal_papillary
SAMf2aae1443f67	Basal	Luminal	MC1	UroB	luminal	Luminal_papillary
SAM2bba8cb35e48	Differentiated	Basal	MC4	Uro-Inf	p53-like	Luminal_infiltrated
SAMcee0fa8c05b4	Differentiated	Luminal	MC1	GU	p53-like	Luminal_infiltrated
SAM5c139c5c1c4f	Basal	Basal	MC7	UroB	luminal	Basal_squamous
SAMc1251c7bfee2	Basal	Basal	MC7	GU-Inf	p53-like	Basal_squamous
SAM6780ed436b55	Basal	Basal	MC7	Ba/Sq	basal	Basal_squamous
SAM85f0a3ac1c45	Differentiated	Luminal	MC1	UroA-Prog	luminal	Luminal_papillary
SAM9d2494119c05	Differentiated	Luminal	MC1	UroA-Prog	luminal	Luminal
SAM9410b866974a	Basal	Basal	MC4	Mes-like	basal	Basal_squamous
SAM5d989c86255e	Differentiated	Luminal	MC5	UroC	luminal	Luminal_infiltrated
SAM27299aed7681	Differentiated	Luminal	MC1	UroA-Prog	luminal	Luminal_papillary
SAM49d48750e294	Basal	Basal	MC4	Ba/Sq-Inf	p53-like	Luminal_infiltrated
SAMd43f8933066b	Basal	Luminal	MC4	GU	p53-like	Luminal_infiltrated
SAM7aa01fc49a80	Basal	Luminal	MC4	Mes-like	p53-like	Luminal_infiltrated
SAM0257bbbbd388	Differentiated	Luminal	MC1	GU	luminal	Luminal_papillary
SAMc919aebc7fdd	Basal	Luminal	MC4	UroB	p53-like	Luminal_infiltrated
SAMa321770ac31c	Basal	Basal	MC7	UroB	basal	Basal_squamous
SAM3894ac3956a5	Differentiated	Luminal	MC4	UroC	p53-like	Luminal_infiltrated
SAM3779e979db6b	Basal	Luminal	MC4	Uro-Inf	p53-like	Luminal_infiltrated
SAM1c0ecfb3eb63	Basal	Basal	MC7	Ba/Sq-Inf	basal	Basal_squamous
SAMbf91f27e7f9b	Basal	Luminal	MC4	Mes-like	p53-like	Luminal_infiltrated
SAMbcb07ba81cee	Basal	Basal	MC7	Ba/Sq	basal	Basal_squamous
SAM9aa6a095a9d6	Basal	Basal	MC7	UroB	basal	Basal_squamous
SAM957378bd907f	Basal	Basal	MC4	Mes-like	p53-like	Basal_squamous
SAMf82bbdc267c8	Differentiated	Luminal	MC1	UroA-Prog	luminal	Luminal
SAM2624229effe8	Basal	Basal	MC4	Uro-Inf	p53-like	Luminal_infiltrated
SAMd2492b2a31bb	Basal	Basal	MC7	Ba/Sq-Inf	basal	Basal_squamous
SAM670649e105b5	Basal	Luminal	MC7	Ba/Sq	luminal	Luminal_infiltrated
SAM91c47b054ffb	Basal	Luminal	MC3	GU	luminal	Luminal
SAM491e341d5a82	Differentiated	Luminal	MC3	UroC	luminal	Luminal
SAM5fe7a81a39dd	Differentiated	Luminal	MC1	UroC	luminal	Luminal
SAM29da928587ad	Basal	Basal	MC4	Ba/Sq-Inf	basal	Luminal_infiltrated
SAM0a0f2bac4b20	Basal	Basal	MC7	Ba/Sq	basal	Basal_squamous
SAM8e469834acc1	Basal	Luminal	MC4	Uro-Inf	p53-like	Luminal_infiltrated
SAM8e43e9caf307	Differentiated	Luminal	MC1	UroC	luminal	Luminal
SAM99b1f6a9534e	Differentiated	Luminal	MC1	UroC	luminal	Luminal
SAM12502d970c10	Differentiated	Luminal	MC2	UroA-Prog	p53-like	Luminal_infiltrated
SAM9681450bbc90	Basal	Basal	MC4	Ba/Sq-Inf	basal	Basal_squamous
SAM7d7c54623618	Differentiated	Luminal	MC3	Sc/NE-like	luminal	Neuronal
SAM181b638b8248	Basal	Basal	MC7	Ba/Sq-Inf	basal	Basal_squamous
SAMbfdffb97c446	Basal	Basal	MC7	GU-Inf	luminal	Luminal_infiltrated
SAM3b15b4c6311d	Basal	Basal	MC7	Ba/Sq	basal	Basal_squamous
SAM00b9e5c52da9	Basal	Basal	MC7	Ba/Sq	basal	Basal_squamous
SAM59b825252c0d	Basal	Basal	MC7	Ba/Sq	basal	Basal_squamous
SAM1c8b086175ca	Differentiated	Basal	MC4	Mes-like	p53-like	Luminal_infiltrated
SAMeaa477a5384b	Differentiated	Luminal	MC7	UroB	luminal	Luminal_infiltrated
SAM1dda30f1c5be	Basal	Basal	MC4	Mes-like	p53-like	Luminal_infiltrated
SAM9eebdef2858a	Differentiated	Basal	MC2	GU-Inf	p53-like	Luminal_infiltrated
SAM9daccafc18db	Differentiated	Basal	MC5	Ba/Sq-Inf	p53-like	Luminal_infiltrated
SAM2eb07dedf07f	Basal	Basal	MC4	Mes-like	p53-like	Luminal_infiltrated
SAM25510f300d79	Basal	Basal	MC7	Ba/Sq	basal	Basal_squamous
SAMbda79f955628	Differentiated	Luminal	MC5	UroC	luminal	Luminal_infiltrated
SAM9b9d48b0b02c	Differentiated	Luminal	MC1	GU	luminal	Luminal_papillary
SAMff41c4e8c08f	Differentiated	Luminal	MC4	UroA-Prog	p53-like	Luminal_infiltrated
SAMc97f35a29d16	Basal	Luminal	MC1	UroB	luminal	Luminal_papillary
SAM187e056d6a2a	Differentiated	Luminal	MC4	Uro-Inf	p53-like	Luminal_infiltrated
SAMbc8dc3a7b54e	Differentiated	Luminal	MC1	GU	luminal	Luminal_papillary
SAM7b40007f4aa4	Basal	Basal	MC7	Sc/NE-like	luminal	Neuronal
SAM568ce160abd9	Basal	Basal	MC4	Mes-like	p53-like	Luminal_infiltrated
SAM14938611a2d3	Differentiated	Luminal	MC2	GU	luminal	Luminal
SAM1a87df750b9d	Basal	Basal	MC7	Ba/Sq	basal	Basal_squamous
SAMae02629a97f7	Differentiated	Luminal	MC1	UroA-Prog	p53-like	Luminal_papillary
SAM47fc46c3d6be	Basal	Basal	MC4	Mes-like	basal	Basal_squamous
SAM7829a341b9f3	Basal	Basal	MC7	UroB	basal	Basal_squamous
SAM0f956e757453	Differentiated	Luminal	MC4	GU	p53-like	Luminal_infiltrated
SAMaf42c1541269	Differentiated	Luminal	MC5	GU-Inf	luminal	Luminal_infiltrated
SAM09c84ec0cf34	Differentiated	Luminal	MC5	Uro-Inf	p53-like	Luminal_infiltrated
SAM7538ad9ff524	Basal	Basal	MC7	Ba/Sq	basal	Basal_squamous
SAM95c70496ffb5	Basal	Basal	MC4	Ba/Sq-Inf	basal	Luminal_infiltrated
SAM7edacb3deb65	Differentiated	Luminal	MC3	UroC	luminal	Luminal
SAMb2e4a082541a	Basal	Basal	MC4	Mes-like	p53-like	Basal_squamous
SAM771445e92421	Basal	Basal	MC4	Mes-like	p53-like	Luminal_infiltrated
SAM59fda9035d1d	Basal	Basal	MC4	Mes-like	basal	Basal_squamous
SAM727c0e92a2a7	Differentiated	Luminal	MC7	GU-Inf	luminal	Luminal_infiltrated
SAM6f2a102a99df	Differentiated	Basal	MC7	GU-Inf	luminal	Basal_squamous
SAMe56c96c51190	Basal	Basal	MC7	Ba/Sq-Inf	basal	Basal_squamous
SAM2b672f4336c7	Differentiated	Luminal	MC2	UroA-Prog	luminal	Luminal_infiltrated
SAM1ab1b28d9f2b	Differentiated	Luminal	MC3	UroC	p53-like	Luminal_infiltrated
SAM1bcc62d8290c	Differentiated	Basal	MC6	Sc/NE-like	p53-like	Neuronal
SAM6662f5181f87	Differentiated	Luminal	MC5	Uro-Inf	p53-like	Luminal_infiltrated
SAMe0c49ea0df5d	Basal	Basal	MC4	Ba/Sq-Inf	p53-like	Luminal_infiltrated
SAM59289ca42c99	Basal	Basal	MC7	Ba/Sq-Inf	basal	Basal_squamous
SAM18b9351e265a	Basal	Basal	MC4	Mes-like	basal	Basal_squamous
SAM7fb7a13c096b	Basal	Luminal	MC4	Uro-Inf	p53-like	Luminal_infiltrated
SAM87a8e18eb45b	Differentiated	Luminal	MC1	UroA-Prog	luminal	Luminal_papillary
SAM1f3c93814cb9	Differentiated	Luminal	MC4	GU-Inf	p53-like	Luminal_infiltrated
SAM5fc9ae0aed1f	Basal	Basal	MC7	Ba/Sq	basal	Basal_squamous
SAM9725303dce0c	Differentiated	Luminal	MC1	GU	luminal	Luminal_papillary
SAM6ff654a20f98	Differentiated	Luminal	MC5	Uro-Inf	p53-like	Luminal_infiltrated
SAM65afda25b920	Basal	Basal	MC4	Mes-like	p53-like	Luminal_infiltrated
SAMef0e3d2415fd	Basal	Basal	MC4	Mes-like	basal	Basal_squamous
SAM07a93a28f801	Differentiated	Luminal	MC3	GU	p53-like	Luminal_infiltrated
SAM94859b440b1d	Differentiated	Luminal	MC1	UroA-Prog	p53-like	Luminal_papillary
SAM58e7832f4e7d	Differentiated	Luminal	MC1	UroA-Prog	luminal	Luminal_papillary
SAMc57eadb2d82b	Differentiated	Luminal	MC1	UroA-Prog	luminal	Luminal_papillary
SAMd5ab7fbfab4e	Differentiated	Luminal	MC3	GU	luminal	Luminal_infiltrated
SAM5767dd75d142	Differentiated	Luminal	MC7	GU-Inf	luminal	Luminal_infiltrated
SAMaabf4afe4213	Differentiated	Luminal	MC3	UroC	luminal	Luminal_infiltrated
SAMcc7a42d87e9c	Differentiated	Luminal	MC4	UroA-Prog	p53-like	Luminal_infiltrated
SAMce39dd79b441	Basal	Basal	MC7	Ba/Sq	basal	Basal_squamous
SAM75f12d1a55fc	Basal	Basal	MC4	Mes-like	basal	Basal_squamous
SAM6964a6d7b967	Differentiated	Luminal	MC1	GU	luminal	Luminal_papillary
SAM3b1066e5801b	Basal	Basal	MC4	Mes-like	p53-like	Luminal_infiltrated
SAMf20b827dca51	Basal	Luminal	MC4	Mes-like	p53-like	Luminal_infiltrated
SAM6792d6e98068	Differentiated	Luminal	MC1	UroA-Prog	luminal	Luminal_papillary
SAM31d9176e11fb	Basal	Basal	MC7	Ba/Sq	basal	Basal_squamous
SAM04c589eb3fb3	Basal	Basal	MC7	Ba/Sq	basal	Basal_squamous
SAM5cc2d9036053	Basal	Luminal	MC4	Uro-Inf	p53-like	Luminal_infiltrated
SAMb8101c538753	Basal	Basal	MC7	Ba/Sq-Inf	p53-like	Basal_squamous
SAM80c6183220e6	Basal	Basal	MC7	Ba/Sq	basal	Basal_squamous
SAM572f19794c96	Basal	Luminal	MC7	UroA-Prog	luminal	Basal_squamous
SAM1abf01dd4544	Differentiated	Luminal	MC5	UroC	luminal	Luminal_infiltrated
SAM1f83ebd6be9b	Differentiated	Luminal	MC1	UroA-Prog	luminal	Luminal_papillary
SAM1f66db567eb5	Basal	Basal	MC7	Ba/Sq-Inf	basal	Basal_squamous
SAM4918c524b83a	Differentiated	Luminal	MC2	UroC	luminal	Luminal
SAMa0ca029b7afd	Differentiated	Luminal	MC2	UroC	p53-like	Luminal_infiltrated
SAM6157c8f38b72	Differentiated	Luminal	MC4	Uro-Inf	p53-like	Luminal_infiltrated
SAMe7e4f7c076a7	Basal	Basal	MC7	Ba/Sq	basal	Basal_squamous
SAMbe25e2c88f3e	Basal	Basal	MC7	Ba/Sq	basal	Basal_squamous
SAM4caabd64e7fd	Basal	Luminal	MC7	UroB	luminal	Luminal_papillary
SAMc6eff056c89a	Basal	Basal	MC7	UroB	basal	Basal_squamous
SAM5cfa1699bdb7	Differentiated	Luminal	MC5	GU-Inf	p53-like	Luminal_infiltrated
SAMda4d892fddc8	Basal	Luminal	MC4	Uro-Inf	p53-like	Luminal_infiltrated
SAM3a1c9632ff7b	Differentiated	Luminal	MC1	UroA-Prog	luminal	Luminal
SAM8b4b8b0f9e73	Basal	Luminal	MC4	Mes-like	p53-like	Luminal_infiltrated
SAMe3d4266775a9	Differentiated	Luminal	MC1	UroA-Prog	luminal	Luminal
SAM2de7cffb5f72	Differentiated	Luminal	MC1	UroC	luminal	Luminal

## Sheet: Sheet3
Table 3.The results of Gene Set Enrichment Analysis.
ID	Description	setSize	enrichmentScore	NES	pvalue	p.adjust	qvalues	rank	leading_edge
KEGG_MTOR_SIGNALING_PATHWAY	KEGG_MTOR_SIGNALING_PATHWAY	52	0.528726	1.50314	0.0150943	0.0364617	0.0202221	6605	tags=25%, list=19%, signal=20%
KEGG_FC_GAMMA_R_MEDIATED_PHAGOCYTOSIS	KEGG_FC_GAMMA_R_MEDIATED_PHAGOCYTOSIS	95	0.494812	1.5081	0.00597372	0.0194357	0.0107793	9827	tags=45%, list=29%, signal=32%
KEGG_ACUTE_MYELOID_LEUKEMIA	KEGG_ACUTE_MYELOID_LEUKEMIA	57	0.526544	1.51382	0.0111801	0.028882	0.0160183	8319	tags=35%, list=24%, signal=27%
KEGG_PPAR_SIGNALING_PATHWAY	KEGG_PPAR_SIGNALING_PATHWAY	69	0.512238	1.51725	0.00725514	0.0217654	0.0120714	7441	tags=39%, list=22%, signal=31%
KEGG_BUTANOATE_METABOLISM	KEGG_BUTANOATE_METABOLISM	34	0.570119	1.52147	0.0200267	0.0465621	0.0258239	2075	tags=18%, list=6%, signal=17%
KEGG_PATHWAYS_IN_CANCER	KEGG_PATHWAYS_IN_CANCER	324	0.458991	1.5259	0.00102459	0.00636986	0.0035328	7155	tags=31%, list=21%, signal=25%
KEGG_NEUROACTIVE_LIGAND_RECEPTOR_INTERACTION	KEGG_NEUROACTIVE_LIGAND_RECEPTOR_INTERACTION	270	0.469335	1.5548	0.00103842	0.00636986	0.0035328	5161	tags=33%, list=15%, signal=28%
KEGG_ERBB_SIGNALING_PATHWAY	KEGG_ERBB_SIGNALING_PATHWAY	87	0.520117	1.57192	0.00477897	0.0166398	0.00922865	7155	tags=33%, list=21%, signal=26%
KEGG_PHOSPHATIDYLINOSITOL_SIGNALING_SYSTEM	KEGG_PHOSPHATIDYLINOSITOL_SIGNALING_SYSTEM	76	0.527307	1.57895	0.00483092	0.0166398	0.00922865	7455	tags=42%, list=22%, signal=33%
KEGG_PRION_DISEASES	KEGG_PRION_DISEASES	35	0.586544	1.57975	0.00927152	0.0249928	0.0138613	5437	tags=26%, list=16%, signal=22%
KEGG_PROXIMAL_TUBULE_BICARBONATE_RECLAMATION	KEGG_PROXIMAL_TUBULE_BICARBONATE_RECLAMATION	23	0.639338	1.5807	0.0157819	0.0376338	0.0208722	2760	tags=26%, list=8%, signal=24%
KEGG_NEUROTROPHIN_SIGNALING_PATHWAY	KEGG_NEUROTROPHIN_SIGNALING_PATHWAY	126	0.506603	1.58474	0.00113895	0.00636986	0.0035328	8911	tags=37%, list=26%, signal=27%
KEGG_TGF_BETA_SIGNALING_PATHWAY	KEGG_TGF_BETA_SIGNALING_PATHWAY	85	0.526758	1.58737	0.00241546	0.0101183	0.00561174	8054	tags=45%, list=23%, signal=34%
KEGG_ECM_RECEPTOR_INTERACTION	KEGG_ECM_RECEPTOR_INTERACTION	84	0.530327	1.59479	0.00120773	0.00636986	0.0035328	5137	tags=39%, list=15%, signal=33%
KEGG_SYSTEMIC_LUPUS_ERYTHEMATOSUS	KEGG_SYSTEMIC_LUPUS_ERYTHEMATOSUS	117	-0.41401	-1.60211	0.0147059	0.0364617	0.0202221	5041	tags=39%, list=15%, signal=34%
KEGG_VEGF_SIGNALING_PATHWAY	KEGG_VEGF_SIGNALING_PATHWAY	75	0.54023	1.61219	0.00243309	0.0101183	0.00561174	5405	tags=31%, list=16%, signal=26%
KEGG_GNRH_SIGNALING_PATHWAY	KEGG_GNRH_SIGNALING_PATHWAY	100	0.524908	1.61238	0.00234192	0.0101183	0.00561174	7442	tags=37%, list=22%, signal=29%
KEGG_INTESTINAL_IMMUNE_NETWORK_FOR_IGA_PRODUCTION	KEGG_INTESTINAL_IMMUNE_NETWORK_FOR_IGA_PRODUCTION	34	0.606438	1.6184	0.00534045	0.0177427	0.00984031	8410	tags=65%, list=25%, signal=49%
KEGG_DRUG_METABOLISM_OTHER_ENZYMES	KEGG_DRUG_METABOLISM_OTHER_ENZYMES	51	0.569773	1.62139	0.00375469	0.014859	0.00824098	7033	tags=43%, list=20%, signal=34%
KEGG_O_GLYCAN_BIOSYNTHESIS	KEGG_O_GLYCAN_BIOSYNTHESIS	30	0.618371	1.6214	0.00673854	0.0208895	0.0115856	3266	tags=33%, list=10%, signal=30%
KEGG_FOCAL_ADHESION	KEGG_FOCAL_ADHESION	199	0.498447	1.62219	0.00107296	0.00636986	0.0035328	8054	tags=40%, list=23%, signal=31%
KEGG_FATTY_ACID_METABOLISM	KEGG_FATTY_ACID_METABOLISM	42	0.591783	1.62804	0.00657895	0.0207404	0.0115029	7441	tags=36%, list=22%, signal=28%
KEGG_SPLICEOSOME	KEGG_SPLICEOSOME	126	-0.419249	-1.63247	0.00806452	0.0234375	0.0129987	13645	tags=68%, list=40%, signal=41%
KEGG_ADIPOCYTOKINE_SIGNALING_PATHWAY	KEGG_ADIPOCYTOKINE_SIGNALING_PATHWAY	67	0.555309	1.6348	0.00244798	0.0101183	0.00561174	8971	tags=46%, list=26%, signal=34%
KEGG_ASTHMA	KEGG_ASTHMA	16	0.707314	1.64097	0.0167939	0.0395401	0.0219294	6948	tags=62%, list=20%, signal=50%
KEGG_GLYCOSPHINGOLIPID_BIOSYNTHESIS_LACTO_AND_NEOLACTO_SERIES	KEGG_GLYCOSPHINGOLIPID_BIOSYNTHESIS_LACTO_AND_NEOLACTO_SERIES	26	0.655732	1.65279	0.00698324	0.0212932	0.0118094	2391	tags=27%, list=7%, signal=25%
KEGG_ABC_TRANSPORTERS	KEGG_ABC_TRANSPORTERS	44	0.597892	1.66296	0.00130378	0.00636986	0.0035328	6597	tags=48%, list=19%, signal=39%
KEGG_MELANOGENESIS	KEGG_MELANOGENESIS	101	0.54235	1.66586	0.00117233	0.00636986	0.0035328	7538	tags=40%, list=22%, signal=31%
KEGG_PORPHYRIN_AND_CHLOROPHYLL_METABOLISM	KEGG_PORPHYRIN_AND_CHLOROPHYLL_METABOLISM	41	0.61059	1.66882	0.00399467	0.0150085	0.00832388	3688	tags=27%, list=11%, signal=24%
KEGG_ENDOCYTOSIS	KEGG_ENDOCYTOSIS	175	0.519387	1.6739	0.00109409	0.00636986	0.0035328	8305	tags=34%, list=24%, signal=26%
KEGG_BASE_EXCISION_REPAIR	KEGG_BASE_EXCISION_REPAIR	33	-0.53023	-1.67881	0.0114943	0.0292867	0.0162428	8444	tags=48%, list=25%, signal=37%
KEGG_INSULIN_SIGNALING_PATHWAY	KEGG_INSULIN_SIGNALING_PATHWAY	137	0.530999	1.67937	0.00111483	0.00636986	0.0035328	6905	tags=29%, list=20%, signal=23%
KEGG_CHEMOKINE_SIGNALING_PATHWAY	KEGG_CHEMOKINE_SIGNALING_PATHWAY	187	0.519945	1.68178	0.00108932	0.00636986	0.0035328	5029	tags=27%, list=15%, signal=23%
KEGG_FC_EPSILON_RI_SIGNALING_PATHWAY	KEGG_FC_EPSILON_RI_SIGNALING_PATHWAY	78	0.562405	1.68294	0.00120919	0.00636986	0.0035328	6696	tags=37%, list=20%, signal=30%
KEGG_AXON_GUIDANCE	KEGG_AXON_GUIDANCE	129	0.538129	1.68461	0.00113636	0.00636986	0.0035328	6657	tags=40%, list=19%, signal=32%
KEGG_TRYPTOPHAN_METABOLISM	KEGG_TRYPTOPHAN_METABOLISM	40	0.620817	1.69681	0.00397878	0.0150085	0.00832388	4832	tags=30%, list=14%, signal=26%
KEGG_ARRHYTHMOGENIC_RIGHT_VENTRICULAR_CARDIOMYOPATHY_ARVC	KEGG_ARRHYTHMOGENIC_RIGHT_VENTRICULAR_CARDIOMYOPATHY_ARVC	74	0.570877	1.69783	0.00122249	0.00636986	0.0035328	4625	tags=34%, list=13%, signal=29%
KEGG_HISTIDINE_METABOLISM	KEGG_HISTIDINE_METABOLISM	29	0.655315	1.69984	0.00408163	0.0150085	0.00832388	4676	tags=38%, list=14%, signal=33%
KEGG_RIBOSOME	KEGG_RIBOSOME	87	-0.464756	-1.71006	0.00606061	0.0194357	0.0107793	15592	tags=79%, list=45%, signal=43%
KEGG_VIRAL_MYOCARDITIS	KEGG_VIRAL_MYOCARDITIS	50	0.60642	1.71956	0.00126263	0.00636986	0.0035328	3008	tags=22%, list=9%, signal=20%
KEGG_PHENYLALANINE_METABOLISM	KEGG_PHENYLALANINE_METABOLISM	18	0.717491	1.7197	0.00887574	0.0247868	0.0137471	4718	tags=44%, list=14%, signal=38%
KEGG_T_CELL_RECEPTOR_SIGNALING_PATHWAY	KEGG_T_CELL_RECEPTOR_SIGNALING_PATHWAY	108	0.559305	1.7325	0.00116009	0.00636986	0.0035328	7910	tags=43%, list=23%, signal=33%
KEGG_RENIN_ANGIOTENSIN_SYSTEM	KEGG_RENIN_ANGIOTENSIN_SYSTEM	17	0.730806	1.73652	0.00892857	0.0247868	0.0137471	704	tags=29%, list=2%, signal=29%
KEGG_PROTEASOME	KEGG_PROTEASOME	45	-0.533955	-1.74173	0.00851064	0.0243535	0.0135068	13405	tags=82%, list=39%, signal=50%
KEGG_WNT_SIGNALING_PATHWAY	KEGG_WNT_SIGNALING_PATHWAY	150	0.554617	1.76429	0.00110497	0.00636986	0.0035328	5309	tags=29%, list=15%, signal=25%
KEGG_RNA_POLYMERASE	KEGG_RNA_POLYMERASE	29	-0.572449	-1.76838	0.0149813	0.0364617	0.0202221	11753	tags=76%, list=34%, signal=50%
KEGG_CELL_CYCLE	KEGG_CELL_CYCLE	124	-0.452846	-1.77026	0.00757576	0.0223665	0.0124047	8911	tags=49%, list=26%, signal=37%
KEGG_CYTOKINE_CYTOKINE_RECEPTOR_INTERACTION	KEGG_CYTOKINE_CYTOKINE_RECEPTOR_INTERACTION	263	0.535506	1.77085	0.00104058	0.00636986	0.0035328	7462	tags=49%, list=22%, signal=39%
KEGG_PRIMARY_IMMUNODEFICIENCY	KEGG_PRIMARY_IMMUNODEFICIENCY	35	0.657963	1.77211	0.0013245	0.00636986	0.0035328	6233	tags=54%, list=18%, signal=44%
KEGG_CARDIAC_MUSCLE_CONTRACTION	KEGG_CARDIAC_MUSCLE_CONTRACTION	73	0.598132	1.77518	0.00122249	0.00636986	0.0035328	2974	tags=22%, list=9%, signal=20%
KEGG_BASAL_CELL_CARCINOMA	KEGG_BASAL_CELL_CARCINOMA	55	0.626082	1.79035	0.00125	0.00636986	0.0035328	3329	tags=33%, list=10%, signal=30%
KEGG_HEDGEHOG_SIGNALING_PATHWAY	KEGG_HEDGEHOG_SIGNALING_PATHWAY	56	0.624987	1.79639	0.00123305	0.00636986	0.0035328	2962	tags=34%, list=9%, signal=31%
KEGG PENTOSE AND GLUCURONATE INTERCONVERSIONS	KEGG_PENTOSE_AND_GLUCURONATE_INTERCONVERSIONS	28	0.702583	1.81039	0.00136986	0.00636986	0.0035328	6153	tags=54%, list=18%, signal=44%
KEGG_MISMATCH_REPAIR	KEGG_MISMATCH_REPAIR	23	-0.633822	-1.81728	0.00983607	0.0261358	0.0144953	8444	tags=65%, list=25%, signal=49%
KEGG NUCLEOTIDE EXCISION REPAIR	KEGG_NUCLEOTIDE_EXCISION_REPAIR	44	-0.559394	-1.81795	0.00425532	0.0152209	0.00844173	10842	tags=64%, list=32%, signal=44%
KEGG ASCORBATE AND ALDARATE METABOLISM	KEGG_ASCORBATE_AND_ALDARATE_METABOLISM	25	0.73175	1.83423	0.00141243	0.00640761	0.00355374	6526	tags=60%, list=19%, signal=49%
KEGG STARCH AND SUCROSE METABOLISM	KEGG_STARCH_AND_SUCROSE_METABOLISM	52	0.646175	1.83704	0.00125786	0.00636986	0.0035328	6265	tags=42%, list=18%, signal=35%
KEGG COMPLEMENT AND COAGULATION CASCADES	KEGG_COMPLEMENT_AND_COAGULATION_CASCADES	69	0.625881	1.85387	0.00120919	0.00636986	0.0035328	5117	tags=38%, list=15%, signal=32%
KEGG STEROID HORMONE BIOSYNTHESIS	KEGG_STEROID_HORMONE_BIOSYNTHESIS	55	0.653771	1.86953	0.00125	0.00636986	0.0035328	4835	tags=49%, list=14%, signal=42%
KEGG ALDOSTERONE REGULATED SODIUM REABSORPTION	KEGG_ALDOSTERONE_REGULATED_SODIUM_REABSORPTION	42	0.682884	1.87866	0.00131579	0.00636986	0.0035328	7439	tags=52%, list=22%, signal=41%
KEGG CELL ADHESION MOLECULES CAMS	KEGG_CELL_ADHESION_MOLECULES_CAMS	113	0.605754	1.88264	0.00116279	0.00636986	0.0035328	5728	tags=50%, list=17%, signal=41%
KEGG HYPERTROPHIC CARDIOMYOPATHY HCM	KEGG_HYPERTROPHIC_CARDIOMYOPATHY_HCM	83	0.63261	1.89897	0.00121359	0.00636986	0.0035328	4788	tags=40%, list=14%, signal=34%
KEGG B CELL RECEPTOR SIGNALING PATHWAY	KEGG_B_CELL_RECEPTOR_SIGNALING_PATHWAY	75	0.638307	1.90489	0.00121655	0.00636986	0.0035328	4933	tags=33%, list=14%, signal=29%
KEGG LINOLEIC ACID METABOLISM	KEGG_LINOLEIC_ACID_METABOLISM	28	0.744524	1.91847	0.00136986	0.00636986	0.0035328	3060	tags=50%, list=9%, signal=46%
KEGG VASCULAR SMOOTH MUSCLE CONTRACTION	KEGG_VASCULAR_SMOOTH_MUSCLE_CONTRACTION	114	0.616777	1.92139	0.00115607	0.00636986	0.0035328	6024	tags=43%, list=18%, signal=36%
KEGG HOMOLOGOUS RECOMBINATION	KEGG_HOMOLOGOUS_RECOMBINATION	28	-0.638419	-1.94236	0.0110294	0.028882	0.0160183	8278	tags=61%, list=24%, signal=46%
KEGG CALCIUM SIGNALING PATHWAY	KEGG_CALCIUM_SIGNALING_PATHWAY	177	0.608663	1.96318	0.0010929	0.00636986	0.0035328	6005	tags=44%, list=17%, signal=37%
KEGG DILATED CARDIOMYOPATHY	KEGG_DILATED_CARDIOMYOPATHY	90	0.653826	1.98472	0.00119474	0.00636986	0.0035328	4696	tags=40%, list=14%, signal=35%
KEGG ARACHIDONIC ACID METABOLISM	KEGG_ARACHIDONIC_ACID_METABOLISM	57	0.710937	2.04395	0.00124224	0.00636986	0.0035328	4703	tags=49%, list=14%, signal=42%
KEGG RETINOL METABOLISM	KEGG_RETINOL_METABOLISM	64	0.702383	2.04783	0.00123762	0.00636986	0.0035328	3892	tags=41%, list=11%, signal=36%
KEGG HEMATOPOIETIC CELL LINEAGE	KEGG_HEMATOPOIETIC_CELL_LINEAGE	82	0.688992	2.06342	0.00121507	0.00636986	0.0035328	5426	tags=48%, list=16%, signal=40%
KEGG TYROSINE METABOLISM	KEGG_TYROSINE_METABOLISM	42	0.759535	2.08953	0.00131579	0.00636986	0.0035328	4828	tags=50%, list=14%, signal=43%
KEGG DNA REPLICATION	KEGG_DNA_REPLICATION	36	-0.68878	-2.17365	0.00411523	0.0150085	0.00832388	8444	tags=81%, list=25%, signal=61%
KEGG METABOLISM OF XENOBIOTICS BY CYTOCHROME P450	KEGG_METABOLISM_OF_XENOBIOTICS_BY_CYTOCHROME_P450	69	0.755201	2.23692	0.00120919	0.00636986	0.0035328	4210	tags=51%, list=12%, signal=45%
KEGG DRUG METABOLISM CYTOCHROME P450	KEGG_DRUG_METABOLISM_CYTOCHROME_P450	71	0.753712	2.2402	0.00121065	0.00636986	0.0035328	4210	tags=51%, list=12%, signal=45%
