# Supplementary figures and images for: ITIH5, as a predictor of prognosis and immunotherapy response for P53-like bladder cancer, is related to cell proliferation and invasion
Source: Royal Society of Chemistry journal article supplement (doi:10.1039/d2mo00322h), 2023-07-11

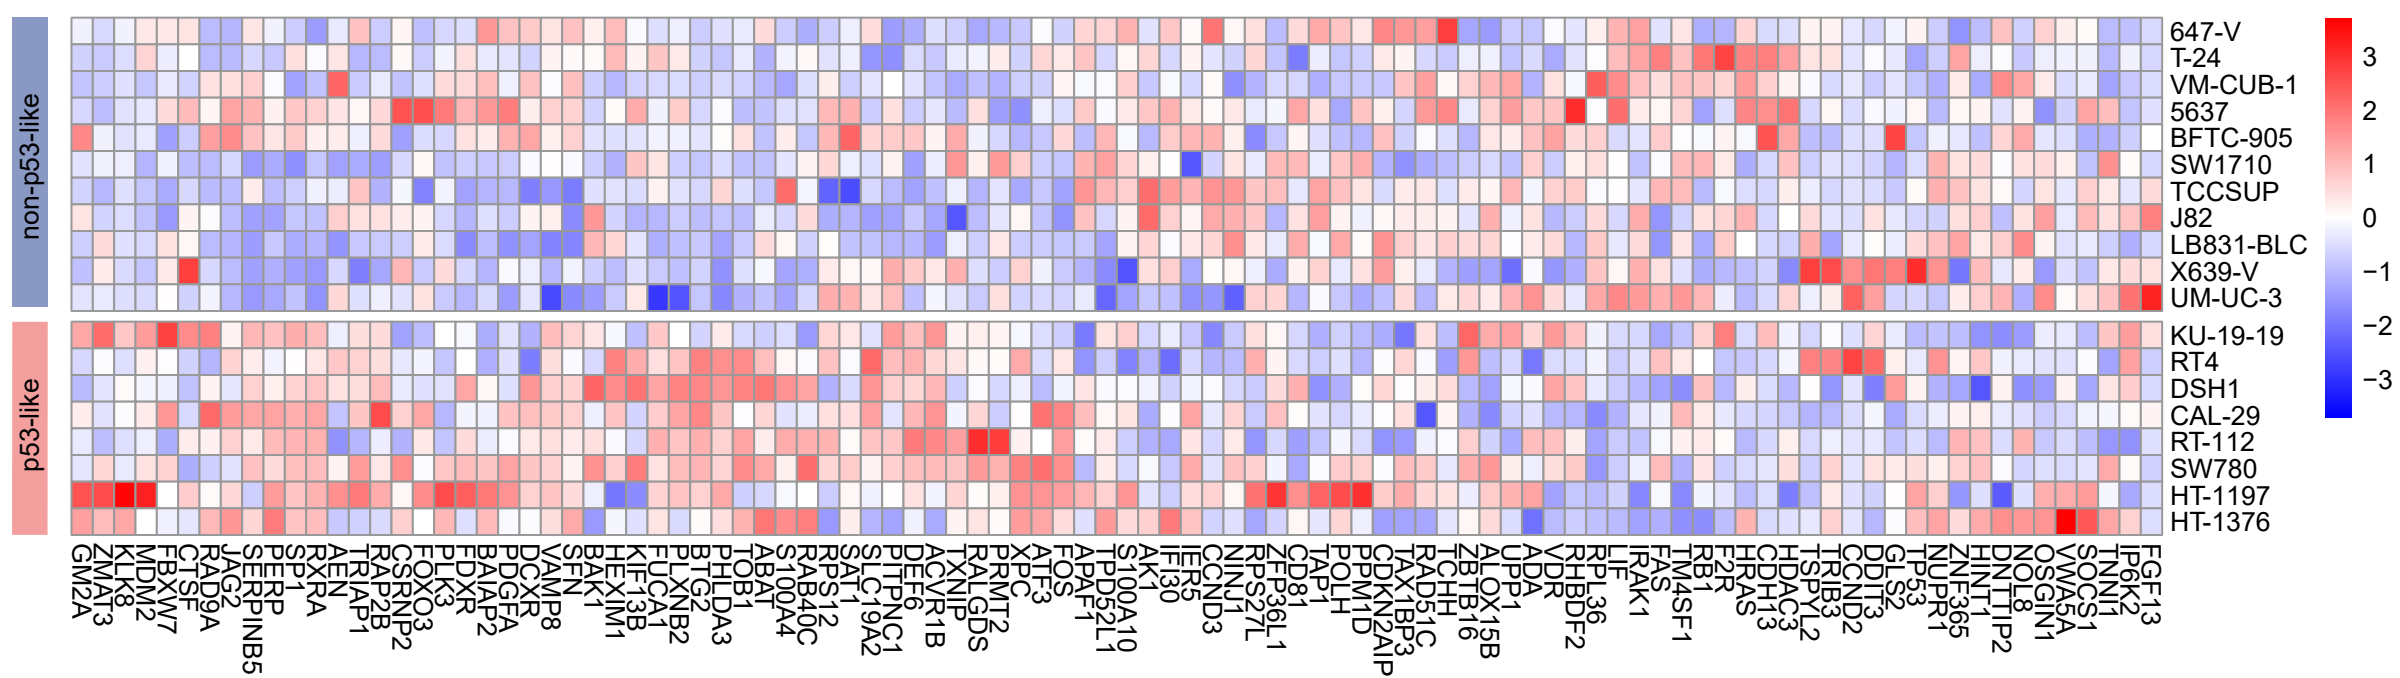

Supplement: d2mo00322h1.pdf [file d2mo00322h1.pdf]

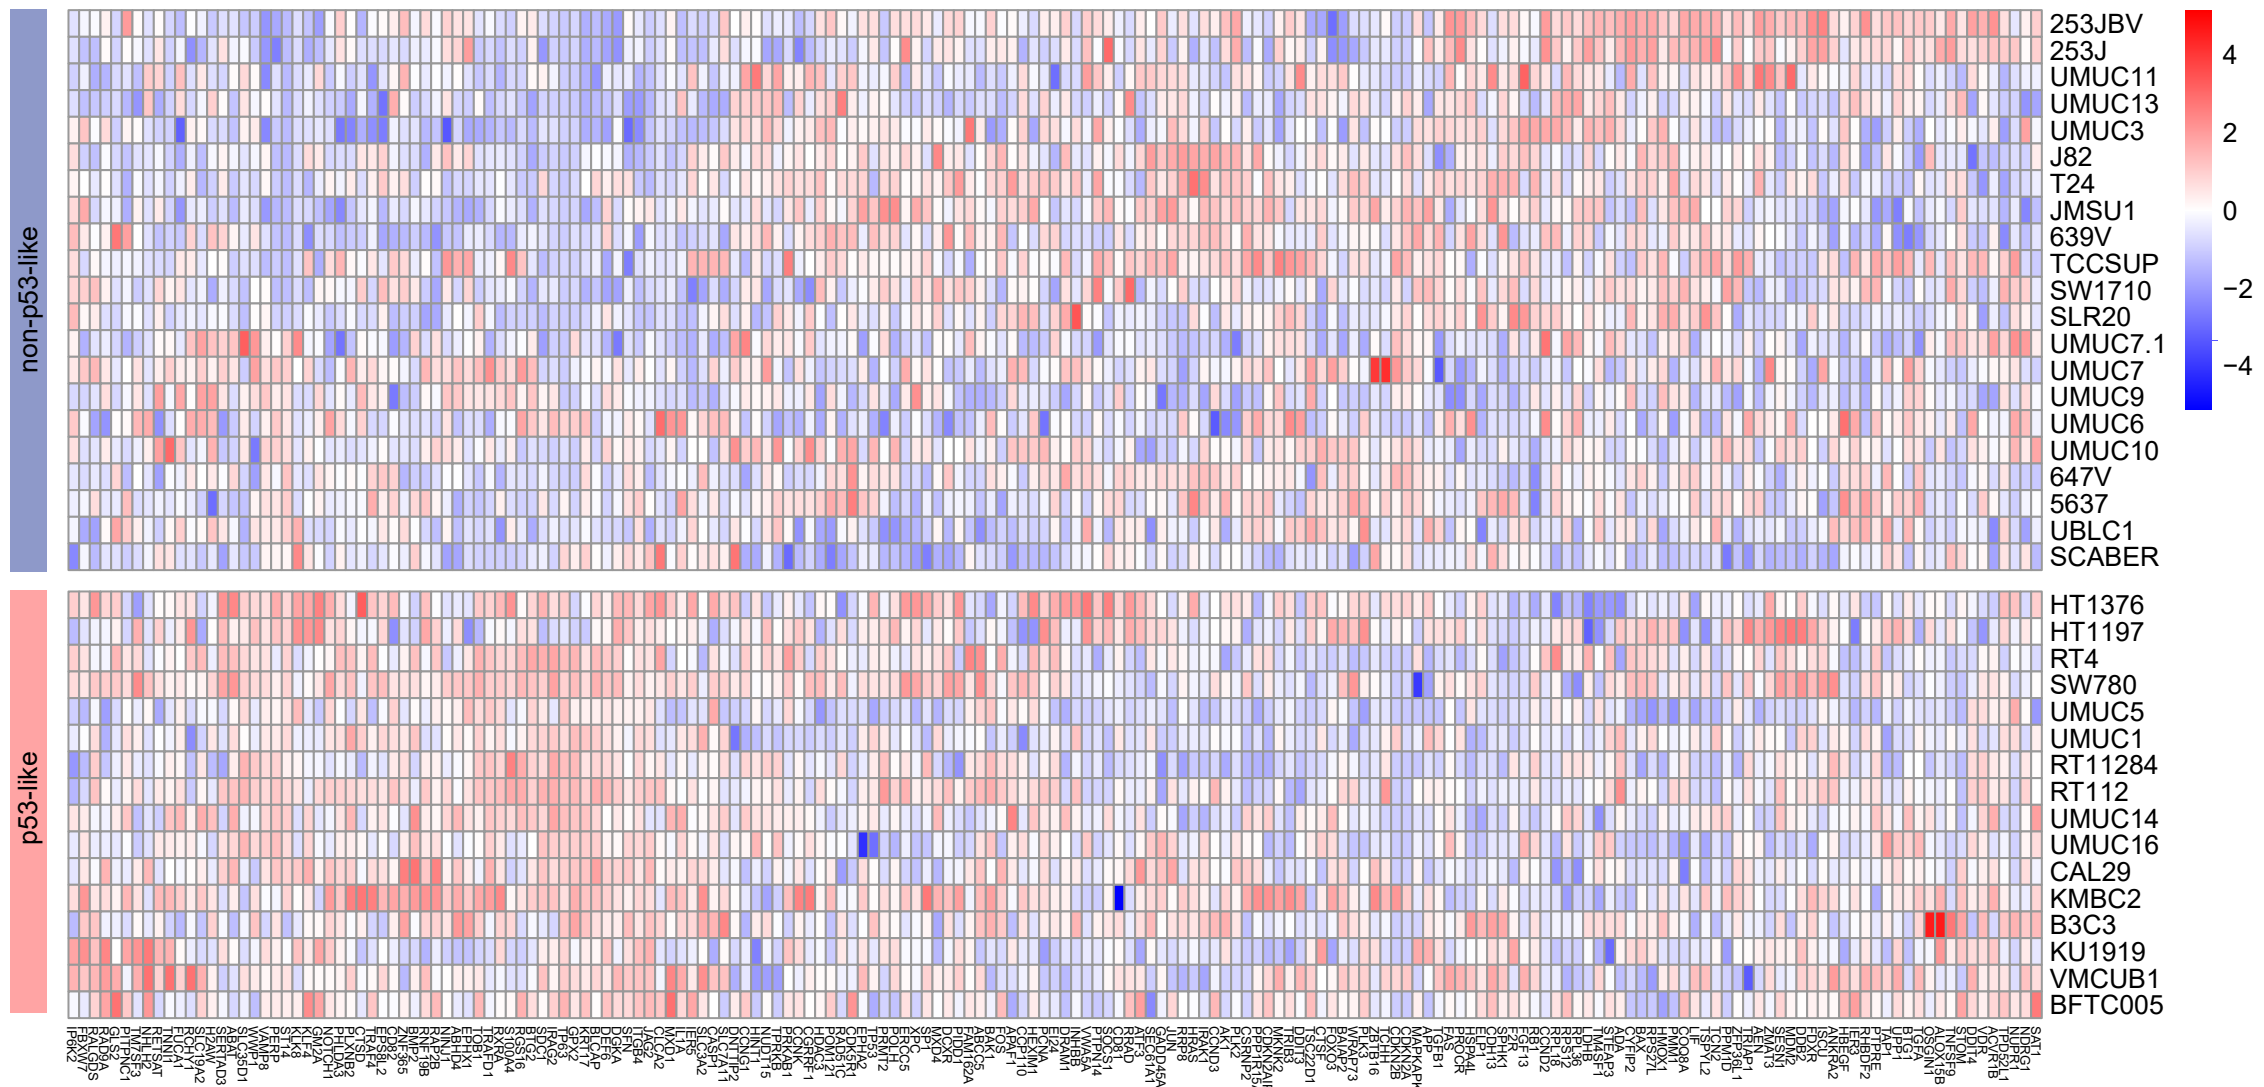

Supplement: d2mo00322h2.pdf [file d2mo00322h2.pdf]

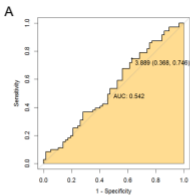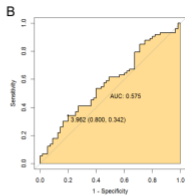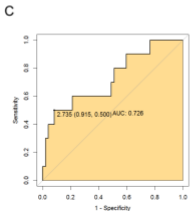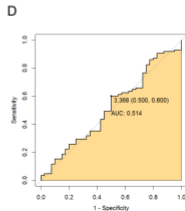

Supplement: d2mo00322h4.pdf [file d2mo00322h4.pdf]

A

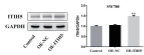

B

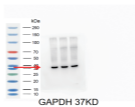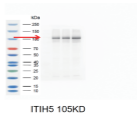

C

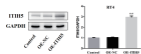

D

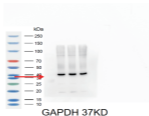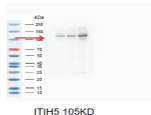

Supplement: d2mo00322h5.pdf [file d2mo00322h5.pdf]

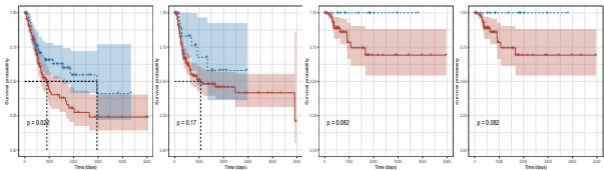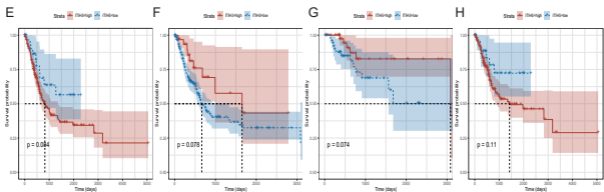

Supplement: d2mo00322h6.pdf [file d2mo00322h6.pdf]

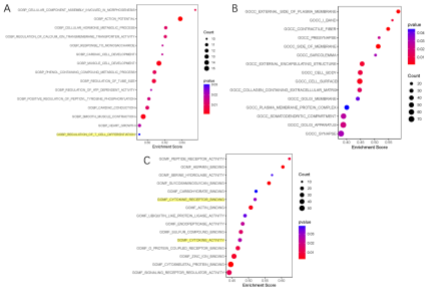

Supplement: d2mo00322h7.pdf [file d2mo00322h7.pdf]
